# Supplementary material for: Exploration and validation of the prognostic value of mitophagy and mitochondrial dynamics-related genes in cervical cancer
Source: Research Square preprint supplement (doi:10.21203/rs.3.rs-5549076/v1), 2025-04-28

# **Exploration and validation of the prognostic value of mitophagy and mitochondrial dynamics-related genes in cervical cancer**

Jiankui Li<sup>1</sup>, Xi Chen<sup>2\*</sup> and Juan Li<sup>1\*</sup>

<sup>1</sup> Department of Gynecology, the 960th Hospital of the Joint Logistics Support Force, 1181886898@qq.com.

<sup>2</sup> Shaanxi Eye Hospital, Xi'an People's Hospital (Xi'an Fourth Hospital), Affiliated People's Hospital of Northwest University, 1124041800@qq.com.

\*Corresponding author: Juan Li, Jinan city, Shandong Province, 250031, China. Email: 15806617381@163.com. Tel:13583190983. Xi Chen, Xi 'an city, Shaanxi Province, 710004, China. E-mail: 1124041800@qq.com. Tel:13399159349 .

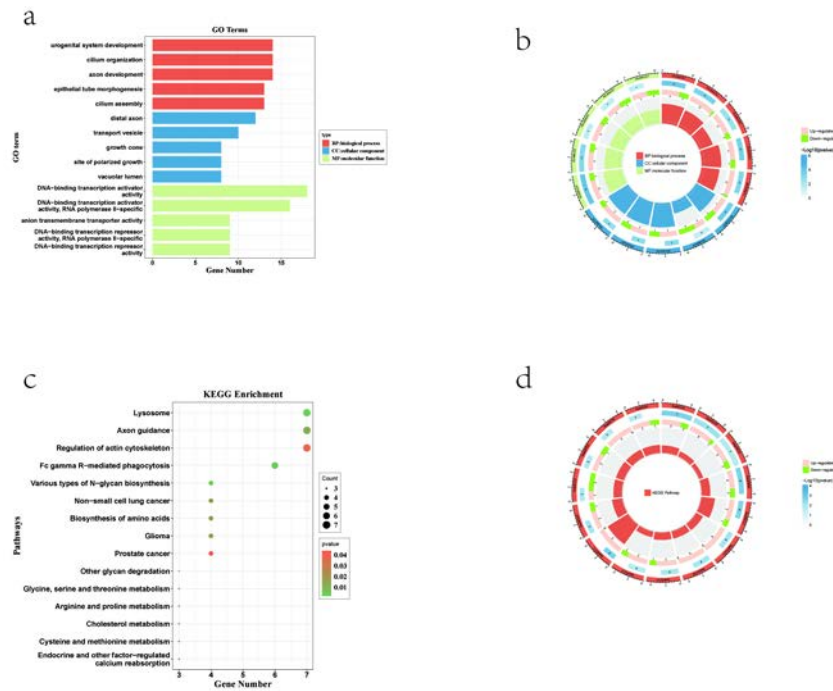

**Figure S1 Functional enrichment analysis.** (a-b) GO enrichment analysis of candidate genes. (c-d) KEGG enrichment results. All  $P$ -value  $< 0.05$ .

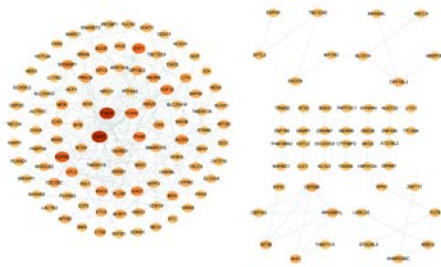

**Figure S2 PPI network.**  $P$ -value =  $1.12 \times 10^{-8}$ .

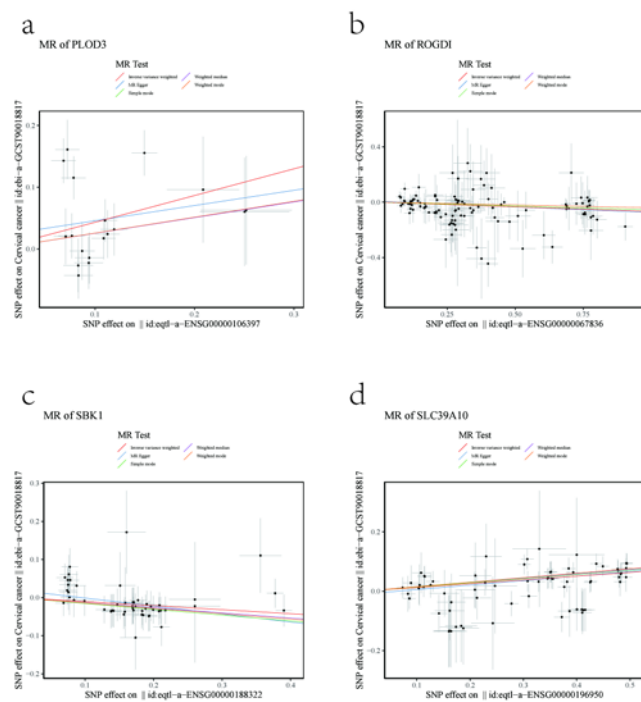

**Figure S3 Correlation analysis between exposure factors and outcome. (a)** Gene PLOD3 was a risk factor. **(b)** Gene ROGDI was a safety factor. **(c)** Gene SBK1 was a safety factor. **(d)** Gene SLC39A10 was a risk factor.

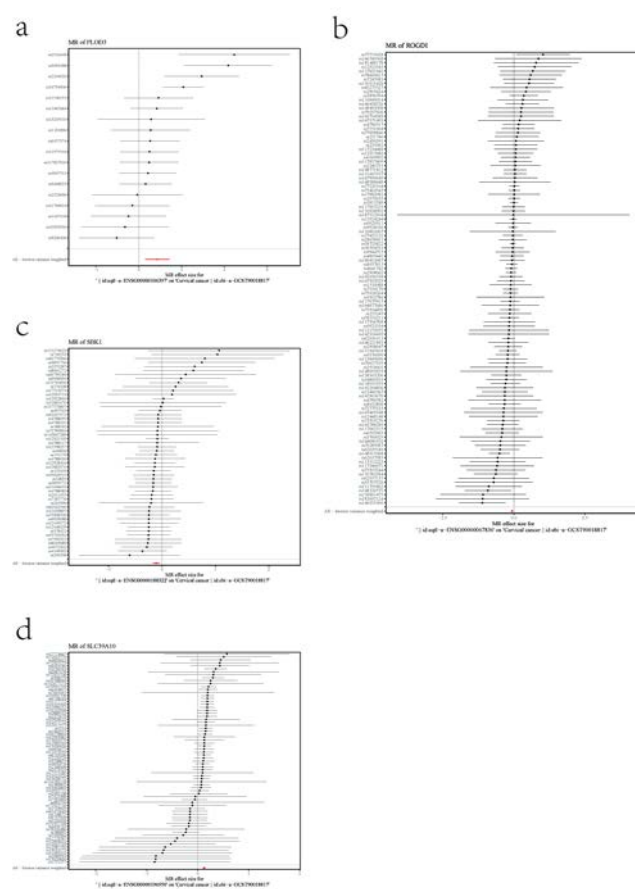

**Figure S4 Prediction of outcome effects of instrumental variables. (a)** PLOD3 was

a risk factor. (b) ROGDI was a safety factor. (c) SBK1 was a safety factor. (d) SLC39A10 was a risk factor.

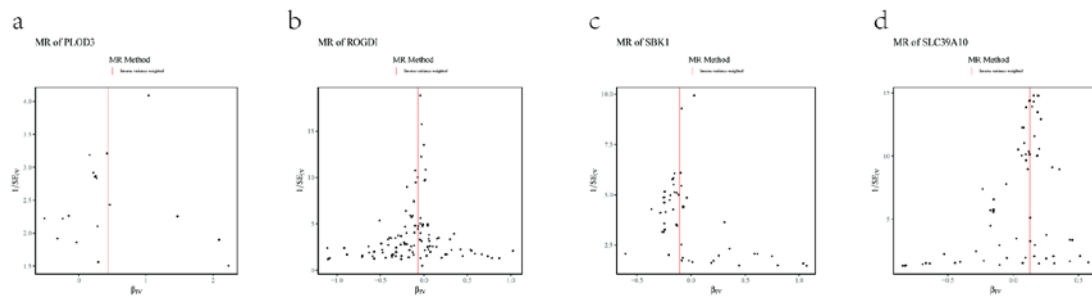

**Figure S5 MR randomnes judgment is symmetrical distribution ((a) PLOD3, (b) ROGDI, (c) SBK1, (d) SLC39A10).**

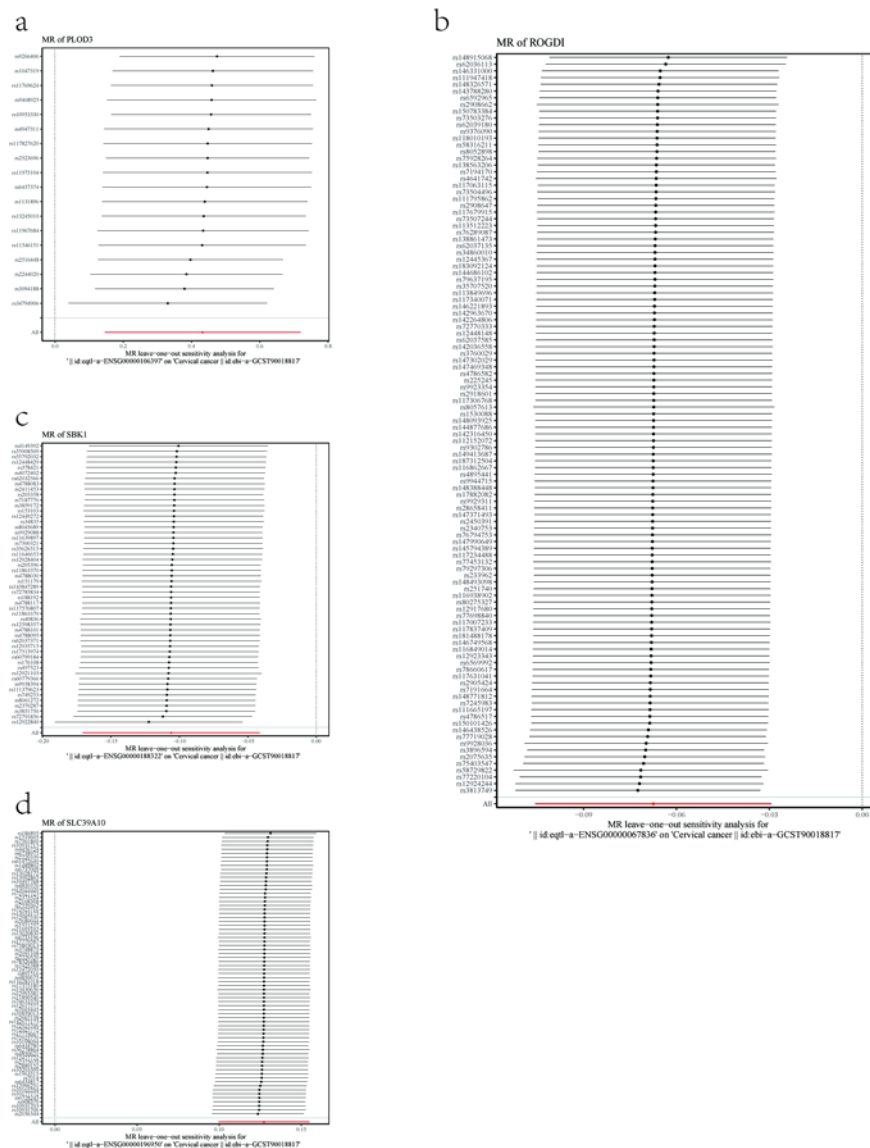

**Figure S6 MR leave-one-out sensitivity analysis (PLOD3 (a), ROGDI (b), SBK1 (c), SLC39A10 (d)).**

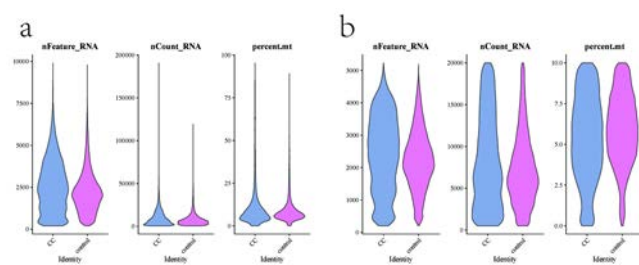

**Figure S7 Single cell quality control.** (a) Before quality control, nFeature\_RNA, nCount\_RNA, percent.mt distribution. (b) after quality control, nFeature\_RNA, nCount\_RNA, percent.mt distribution.

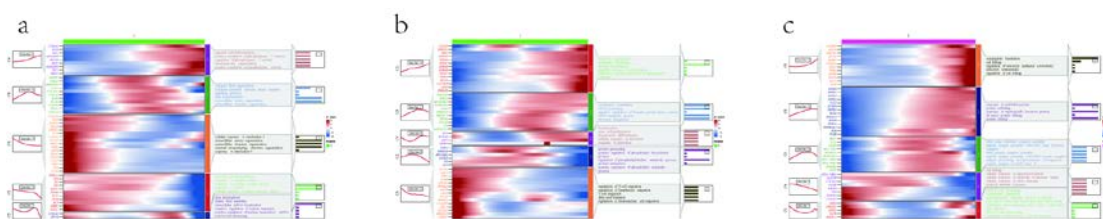

**Figure S8 Go enrichment results** (endothelial cells (a), epithelial cells (b), T cells (c)).

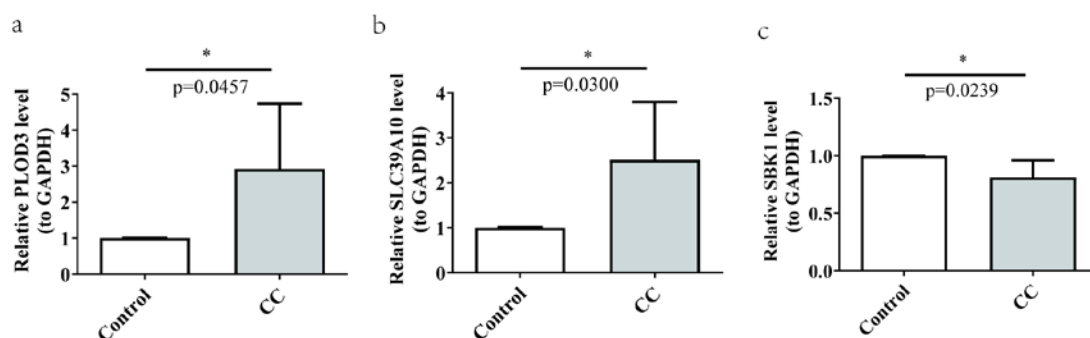

**Figure S9 Reverse transcription quantitative polymerase chain reaction.** (a) PLOD3 was highly expressed in CC. (b) SLC39A10 was highly expressed in CC. (c) SBK1 was low expression in CC. All  $P$ -value < 0.05.

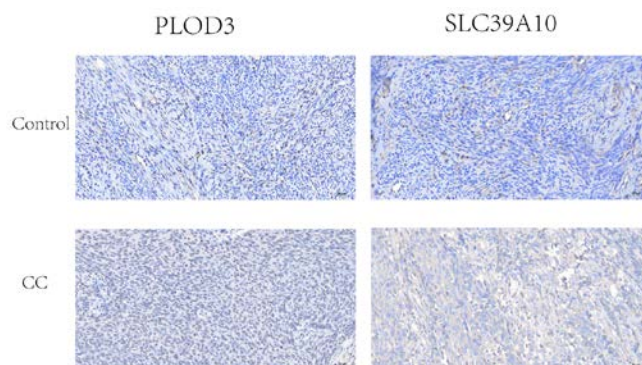

Supplement: Supplementary file 1 [file 80c8b171a76344ef279a263d.pdf]
