# Supplementary material for: Exploration and validation of the prognostic value of mitophagy and mitochondrial dynamics-related genes in cervical cancer
Source: Research Square preprint supplement (doi:10.21203/rs.3.rs-5549076/v1), 2025-04-28
Supplement: Supplementary file 1 [file 23b4341dae275b36a077eb34.xlsx]

## Sheet: 02.results
			Table S2 MR analysis of 18 genes related to OS as exposure factors
	ENSEMBL	id.exposure	id.outcome	outcome	exposure	method	nsnp	b	se	pval	lo_ci	up_ci	or	or_lci95	or_uci95	SYMBOL
1	eqtl-a-ENSG00000067836	eqtl-a-ENSG00000067836	Cervical cancer	Cervical cancer || id:ebi-a-GCST90018817	|| id:eqtl-a-ENSG00000067836	Inverse variance weighted	110	-0.0675011	0.0194663	0.000525167	-0.105655	-0.0293471	0.934727	0.899735	0.971079	ROGDI
2	eqtl-a-ENSG00000106397	eqtl-a-ENSG00000106397	Cervical cancer	Cervical cancer || id:ebi-a-GCST90018817	|| id:eqtl-a-ENSG00000106397	Inverse variance weighted	18	0.432512	0.146373	0.00312809	0.145621	0.719403	1.54112	1.15676	2.05321	PLOD3
3	eqtl-a-ENSG00000188322	eqtl-a-ENSG00000188322	Cervical cancer	Cervical cancer || id:ebi-a-GCST90018817	|| id:eqtl-a-ENSG00000188322	Inverse variance weighted	52	-0.105977	0.0330203	0.00132985	-0.170697	-0.0412576	0.899445	0.843077	0.959582	SBK1
4	eqtl-a-ENSG00000196950	eqtl-a-ENSG00000196950	Cervical cancer	Cervical cancer || id:ebi-a-GCST90018817	|| id:eqtl-a-ENSG00000196950	Inverse variance weighted	71	0.127265	0.0141403	2.25476e-19	0.0995496	0.15498	1.13572	1.10467	1.16763	SLC39A10
