# Supplementary material for: Exploration and validation of the prognostic value of mitophagy and mitochondrial dynamics-related genes in cervical cancer
Source: Research Square preprint supplement (doi:10.21203/rs.3.rs-5549076/v1), 2025-04-28
Supplement: Supplementary file 2 [file 2eec83cd9ca1b1167c9d670b.xlsx]

## Sheet: Sheet1
Table S9 Statistical analysis table
Statistical Analysis
Methods of analysis		R package, algorithms and databases	Threshold value
Differential expression analysis	Differential expression analysis	limma package (v 3.54.0)	adj.P < 0.05, |log2FoldChange (FC)| > 1
Weighted gene co-expression network analysis	Assessing differences in survival between MDGs and MRGs in CC groups	GSVA package's (v 1.46.0)
		survival package (v 3.5-3)	Log-Rank test (P < 0.05)
		WGCNA package (v 1.71)	soft threshold (β);minModuleSize = 100, deepSplit = 4, mergeCutHeight = 0.1;|cor| > 0.3, P < 0.05
Enrichment analysis and protein-protein interactions (PPI) network of candidate genes	Enrichment analysis of candidate genes	clusterProfiler package (v 4.7.1.003)	P < 0.05
	Protein-protein interactions network of candidate genes	(STRING) database (https://string-db.org/)	confidence > 0.4
Univariate Cox regression and Mendelian randomization (MR) analyses	Univariate Cox regression analysis	survival package (v 3.5-3)	hazard ratio (HR) ≠ 1, P < 0.05
	Mendelian randomization analyses	TwoSampleMR package (v 0.6.1)	P < 0.05
Machine learning	Least absolute ahrinkage and aelection operator (LASSO)	glmnet package (v 4.1-4)
	Random survival forest	randomForestSRC package (v 3.2.2)
	Elastic network	glmnet package (v 4.1-4)
	Stepwise Cox regression analysis	survival package (v 3.5-3)
	Ridge	glmnet package (v 4.1-4)
	CoxBoost	CoxBoost package (v 1.4)
	Partial least squares regression	plsRcox package (v 1.7.7)
	Supervised principal components	SuperPC package (v 1.12)
	Generalized boosted modeling	gbm package (v 2.1.8.1)
	Support vector machine-recursive feature elimination	survivalsvm package (v 0.0.5)
Appraisal and verification of the risk model	KM survival analysis	survminer (v 0.4.9)
	Receiver operator characteristic curves	urvivalROC package (v 1.0.3.1)
Independent prognostic analysis	Univariate Cox regression analysis		P < 0.05
	Proportional hazards assumption test		P ˃ 0.05
	Nomogram	rms package (v 6.5-0)
	Calibration curves	rmda package (v 1.6)
Gene set enrichment analysis	Gene set enrichment analysis	clusterProfiler package (v 4.7.1.003)	P < 0.05
Immune infiltration analysis	Differential immune cells		Wilcoxon test (P < 0.05)
	Assessing correlation between DICs and prognostic genes	psych package (v 2.2.9)
	Drug-sensitivity analysis	pRRophetic package (v 0.5)	P < 0.05
scRNA-seq analysis	Single-cell quality control	seurat package (v 5.1.0)	Cells with genes counts between 200 and 6,000, molecules less than 20,000 were remained, mitochondrial genes less than 5% were remained
	Identification of highly variable genes	FindVariableFeatures function	2000
	Cell cluster analysis		Resolution = 0.5
	Functional enrichment analyses	ReactomeGSA package (v 1.12.0)
	Annotated cell-cell interactions of cells	CellChatDB.human (http://www.cellchat.org/)
	Pseudo-time analysis	Monocle algorithm
