# Supplementary material for: Exploration and validation of the prognostic value of mitophagy and mitochondrial dynamics-related genes in cervical cancer
Source: Research Square preprint supplement (doi:10.21203/rs.3.rs-5549076/v1), 2025-04-28
Supplement: Supplementary file 3 [file b9c78867409682e1e7bce864.xlsx]

## Sheet: exposure_dat
Table S1 SNP Information of 18 genes associated with overall survival
beta.exposure	se.exposure	pval.exposure	eaf.exposure	samplesize.exposure	ncase.exposure	SNP	ncontrol.exposure	exposure	mr_keep.exposure	pval_origin.exposure	id.exposure	id	rsid	pval	r2	F
0.135345	0.0122274	1.77786999321051e-28	0.377086	31569	NA	rs3896594	NA	|| id:eqtl-a-ENSG00000067836	TRUE	reported	eqtl-a-ENSG00000067836	eqtl-a-ENSG00000067836	rs3896594	1.77786999321051e-28	0.00386610004589418	122.514834757019
-0.168527	0.013446	4.88877443894144e-36	0.262879	31300	NA	rs9376090	NA	|| id:eqtl-a-ENSG00000067836	TRUE	reported	eqtl-a-ENSG00000067836	eqtl-a-ENSG00000067836	rs9376090	4.88877443894144e-36	0.00499383512681709	157.08149086598
-0.167854	0.0132701	1.13318286793069e-36	0.273956	31300	NA	rs4895441	NA	|| id:eqtl-a-ENSG00000067836	TRUE	reported	eqtl-a-ENSG00000067836	eqtl-a-ENSG00000067836	rs4895441	1.13318286793069e-36	0.00508576520208032	159.987940394722
-0.142304	0.0149679	1.95478951087767e-21	0.195217	31300	NA	rs6569992	NA	|| id:eqtl-a-ENSG00000067836	TRUE	reported	eqtl-a-ENSG00000067836	eqtl-a-ENSG00000067836	rs6569992	1.95478951087767e-21	0.00287949136729304	90.3825766627919
-0.115291	0.0119252	4.12382284321732e-22	0.449532	31684	NA	rs6592965	NA	|| id:eqtl-a-ENSG00000067836	TRUE	reported	eqtl-a-ENSG00000067836	eqtl-a-ENSG00000067836	rs6592965	4.12382284321732e-22	0.00294130586973984	93.4613509853447
0.0938788	0.0155759	1.66820723348528e-09	0.176946	30077	NA	rs77719028	NA	|| id:eqtl-a-ENSG00000067836	TRUE	reported	eqtl-a-ENSG00000067836	eqtl-a-ENSG00000067836	rs77719028	1.66820723348528e-09	0.00120634080830252	36.3245195599855
0.288084	0.0462199	4.58173535127983e-10	0.0168192	16877	NA	rs147990649	NA	|| id:eqtl-a-ENSG00000067836	TRUE	reported	eqtl-a-ENSG00000067836	eqtl-a-ENSG00000067836	rs147990649	4.58173535127983e-10	0.00229660588447747	38.8444346577715
0.145774	0.0253054	8.38146623916864e-09	0.941375	26235	NA	rs12923343	NA	|| id:eqtl-a-ENSG00000067836	TRUE	reported	eqtl-a-ENSG00000067836	eqtl-a-ENSG00000067836	rs12923343	8.38146623916864e-09	0.00126329178681185	33.1818518042908
0.358845	0.0358616	1.42856498139462e-23	0.0281422	30535	NA	rs148326571	NA	|| id:eqtl-a-ENSG00000067836	TRUE	reported	eqtl-a-ENSG00000067836	eqtl-a-ENSG00000067836	rs148326571	1.42856498139462e-23	0.00326839681522762	100.121195756693
0.210207	0.0230263	6.91353236037564e-20	0.0715351	31230	NA	rs8052898	NA	|| id:eqtl-a-ENSG00000067836	TRUE	reported	eqtl-a-ENSG00000067836	eqtl-a-ENSG00000067836	rs8052898	6.91353236037564e-20	0.0026614398626563	83.3332304123342
0.203581	0.0219873	2.06728331753761e-20	0.0790852	31224	NA	rs73503276	NA	|| id:eqtl-a-ENSG00000067836	TRUE	reported	eqtl-a-ENSG00000067836	eqtl-a-ENSG00000067836	rs73503276	2.06728331753761e-20	0.00273811299153533	85.7240860554321
0.0919904	0.013741	2.16570849471007e-11	0.249032	31682	NA	rs251740	NA	|| id:eqtl-a-ENSG00000067836	TRUE	reported	eqtl-a-ENSG00000067836	eqtl-a-ENSG00000067836	rs251740	2.16570849471007e-11	0.00141260852845357	44.8147438708014
0.0939264	0.013752	8.49180475036314e-12	0.248386	31568	NA	rs233962	NA	|| id:eqtl-a-ENSG00000067836	TRUE	reported	eqtl-a-ENSG00000067836	eqtl-a-ENSG00000067836	rs233962	8.49180475036314e-12	0.00147555451874575	46.6461829247253
0.400237	0.0363558	3.46577208993548e-28	0.0273186	29637	NA	rs146331000	NA	|| id:eqtl-a-ENSG00000067836	TRUE	reported	eqtl-a-ENSG00000067836	eqtl-a-ENSG00000067836	rs146331000	3.46577208993548e-28	0.00407268164286233	121.187478505278
0.182745	0.0248738	2.03001851985968e-13	0.0607231	25792	NA	rs117063115	NA	|| id:eqtl-a-ENSG00000067836	TRUE	reported	eqtl-a-ENSG00000067836	eqtl-a-ENSG00000067836	rs117063115	2.03001851985968e-13	0.00208840046468303	53.9725643125659
0.263991	0.0479966	3.79786917028255e-08	0.0155869	12870	NA	rs62037585	NA	|| id:eqtl-a-ENSG00000067836	TRUE	reported	eqtl-a-ENSG00000067836	eqtl-a-ENSG00000067836	rs62037585	3.79786917028255e-08	0.00234508772322848	30.2475219148046
0.272022	0.0373483	3.25536732471637e-13	0.0259746	27058	NA	rs113512223	NA	|| id:eqtl-a-ENSG00000067836	TRUE	reported	eqtl-a-ENSG00000067836	eqtl-a-ENSG00000067836	rs113512223	3.25536732471637e-13	0.00195668123814952	53.0437573040913
0.258296	0.0366997	1.95029361976231e-12	0.0269339	28874	NA	rs73507244	NA	|| id:eqtl-a-ENSG00000067836	TRUE	reported	eqtl-a-ENSG00000067836	eqtl-a-ENSG00000067836	rs73507244	1.95029361976231e-12	0.00171261193172481	49.531359690359
0.479196	0.0329172	5.24082912564029e-48	0.0333187	27780	NA	rs118010193	NA	|| id:eqtl-a-ENSG00000067836	TRUE	reported	eqtl-a-ENSG00000067836	eqtl-a-ENSG00000067836	rs118010193	5.24082912564029e-48	0.00757090579454334	211.908963964016
0.209535	0.0346716	1.50900264147873e-09	0.03031	26949	NA	rs12448148	NA	|| id:eqtl-a-ENSG00000067836	TRUE	reported	eqtl-a-ENSG00000067836	eqtl-a-ENSG00000067836	rs12448148	1.50900264147873e-09	0.00135342610067015	36.5202005273539
-0.287941	0.048439	2.77127739953469e-09	0.0152935	12914	NA	rs187312504	NA	|| id:eqtl-a-ENSG00000067836	TRUE	reported	eqtl-a-ENSG00000067836	eqtl-a-ENSG00000067836	rs187312504	2.77127739953469e-09	0.00272878413737204	35.3304700078711
0.312775	0.0373008	5.0640734952385e-17	0.02601	31238	NA	rs12445367	NA	|| id:eqtl-a-ENSG00000067836	TRUE	reported	eqtl-a-ENSG00000067836	eqtl-a-ENSG00000067836	rs12445367	5.0640734952385e-17	0.0022457847246864	70.3072265557383
0.107065	0.0139989	2.03798038628706e-14	0.764549	30902	NA	rs1530088	NA	|| id:eqtl-a-ENSG00000067836	TRUE	reported	eqtl-a-ENSG00000067836	eqtl-a-ENSG00000067836	rs1530088	2.03798038628706e-14	0.00188929313465788	58.4896619777515
0.165655	0.0298467	2.85338254365753e-08	0.0413912	31240	NA	rs2918601	NA	|| id:eqtl-a-ENSG00000067836	TRUE	reported	eqtl-a-ENSG00000067836	eqtl-a-ENSG00000067836	rs2918601	2.85338254365753e-08	0.000985093379309586	30.8026905093585
0.120103	0.013974	8.34065197408661e-18	0.763706	31231	NA	rs9923354	NA	|| id:eqtl-a-ENSG00000067836	TRUE	reported	eqtl-a-ENSG00000067836	eqtl-a-ENSG00000067836	rs9923354	8.34065197408661e-18	0.00235968663701384	73.8649521277848
0.697265	0.035417	2.77651484610551e-86	0.0282854	25704	NA	rs149413687	NA	|| id:eqtl-a-ENSG00000067836	TRUE	reported	eqtl-a-ENSG00000067836	eqtl-a-ENSG00000067836	rs149413687	2.77651484610551e-86	0.0148549655473545	387.559507631521
0.278938	0.0413432	1.511471630085e-11	0.0211031	29171	NA	rs144686102	NA	|| id:eqtl-a-ENSG00000067836	TRUE	reported	eqtl-a-ENSG00000067836	eqtl-a-ENSG00000067836	rs144686102	1.511471630085e-11	0.00155804033040898	45.5173963369278
-0.219654	0.0300028	2.45753663121504e-13	0.0408736	26617	NA	rs34860010	NA	|| id:eqtl-a-ENSG00000067836	TRUE	reported	eqtl-a-ENSG00000067836	eqtl-a-ENSG00000067836	rs34860010	2.45753663121504e-13	0.00200965678259522	53.5947222658848
0.267569	0.0292992	6.71274268517045e-20	0.0428591	19576	NA	rs62039180	NA	|| id:eqtl-a-ENSG00000067836	TRUE	reported	eqtl-a-ENSG00000067836	eqtl-a-ENSG00000067836	rs62039180	6.71274268517045e-20	0.00424218723364763	83.3903303060527
0.114592	0.0133985	1.20143422654464e-17	0.73172	31566	NA	rs9929311	NA	|| id:eqtl-a-ENSG00000067836	TRUE	reported	eqtl-a-ENSG00000067836	eqtl-a-ENSG00000067836	rs9929311	1.20143422654464e-17	0.00231191291910592	73.1423180486893
0.374024	0.0531859	2.03001851985968e-12	0.0126387	7121	NA	rs80275327	NA	|| id:eqtl-a-ENSG00000067836	TRUE	reported	eqtl-a-ENSG00000067836	eqtl-a-ENSG00000067836	rs80275327	2.03001851985968e-12	0.00689698419169954	49.4406216466337
0.279539	0.0286703	1.84459063758608e-22	0.0448147	19568	NA	rs79637195	NA	|| id:eqtl-a-ENSG00000067836	TRUE	reported	eqtl-a-ENSG00000067836	eqtl-a-ENSG00000067836	rs79637195	1.84459063758608e-22	0.00483469549990053	95.0552151720884
0.124921	0.0134327	1.40701912289033e-20	0.734256	31561	NA	rs7191664	NA	|| id:eqtl-a-ENSG00000067836	TRUE	reported	eqtl-a-ENSG00000067836	eqtl-a-ENSG00000067836	rs7191664	1.40701912289033e-20	0.00273278245652083	86.480213154686
0.325442	0.0522019	4.54087973726852e-10	0.0131361	3616	NA	rs146749568	NA	|| id:eqtl-a-ENSG00000067836	TRUE	reported	eqtl-a-ENSG00000067836	eqtl-a-ENSG00000067836	rs146749568	4.54087973726852e-10	0.0106341570647268	38.8449266834422
0.30549	0.0420183	3.58921934645005e-13	0.0204053	26099	NA	rs17882082	NA	|| id:eqtl-a-ENSG00000067836	TRUE	reported	eqtl-a-ENSG00000067836	eqtl-a-ENSG00000067836	rs17882082	3.58921934645005e-13	0.00202122415533873	52.8547180146498
0.756692	0.0364357	8.46447448097697e-96	0.0265994	25207	NA	rs142036558	NA	|| id:eqtl-a-ENSG00000067836	TRUE	reported	eqtl-a-ENSG00000067836	eqtl-a-ENSG00000067836	rs142036558	8.46447448097697e-96	0.0168226630988987	431.27033902572
0.128507	0.0133181	4.95450190804791e-22	0.727146	30902	NA	rs4786517	NA	|| id:eqtl-a-ENSG00000067836	TRUE	reported	eqtl-a-ENSG00000067836	eqtl-a-ENSG00000067836	rs4786517	4.95450190804791e-22	0.00300383398956432	93.0981215795025
-0.120823	0.0130795	2.51593837869272e-20	0.289814	31140	NA	rs12917680	NA	|| id:eqtl-a-ENSG00000067836	TRUE	reported	eqtl-a-ENSG00000067836	eqtl-a-ENSG00000067836	rs12917680	2.51593837869272e-20	0.00273281269878531	85.327505906474
0.539725	0.0331991	1.98609491735738e-59	0.032612	27766	NA	rs147302029	NA	|| id:eqtl-a-ENSG00000067836	TRUE	reported	eqtl-a-ENSG00000067836	eqtl-a-ENSG00000067836	rs147302029	1.98609491735738e-59	0.00942898071630348	264.278093656276
0.334886	0.045294	1.43119892054185e-13	0.0175065	18927	NA	rs117631041	NA	|| id:eqtl-a-ENSG00000067836	TRUE	reported	eqtl-a-ENSG00000067836	eqtl-a-ENSG00000067836	rs117631041	1.43119892054185e-13	0.00287990604118844	54.6596364467033
0.292194	0.0394068	1.21983193800868e-13	0.0232638	18164	NA	rs117306768	NA	|| id:eqtl-a-ENSG00000067836	TRUE	reported	eqtl-a-ENSG00000067836	eqtl-a-ENSG00000067836	rs117306768	1.21983193800868e-13	0.00301770097015372	54.9733782367696
-0.205875	0.0358642	9.43408967323041e-09	0.0282756	26949	NA	rs147371493	NA	|| id:eqtl-a-ENSG00000067836	TRUE	reported	eqtl-a-ENSG00000067836	eqtl-a-ENSG00000067836	rs147371493	9.43408967323041e-09	0.00122126963638128	32.9497934738611
0.401666	0.0344077	1.73900167374366e-31	0.0305694	20319	NA	rs117837409	NA	|| id:eqtl-a-ENSG00000067836	TRUE	reported	eqtl-a-ENSG00000067836	eqtl-a-ENSG00000067836	rs117837409	1.73900167374366e-31	0.00666213634468828	136.262422955418
0.313149	0.0447177	2.51246488132877e-12	0.0179764	12433	NA	rs116862667	NA	|| id:eqtl-a-ENSG00000067836	TRUE	reported	eqtl-a-ENSG00000067836	eqtl-a-ENSG00000067836	rs116862667	2.51246488132877e-12	0.00392877901150842	49.0312849753797
0.345186	0.0449297	1.55632394718295e-14	0.0177912	5958	NA	rs148493098	NA	|| id:eqtl-a-ENSG00000067836	TRUE	reported	eqtl-a-ENSG00000067836	eqtl-a-ENSG00000067836	rs148493098	1.55632394718295e-14	0.00980973918321721	59.0056364794448
0.257165	0.0442739	6.30724934018296e-09	0.0183657	9921	NA	rs180916700	NA	|| id:eqtl-a-ENSG00000067836	TRUE	reported	eqtl-a-ENSG00000067836	eqtl-a-ENSG00000067836	rs180916700	6.30724934018296e-09	0.00338920858895373	33.7318843861151
0.266636	0.0387434	5.90201080171845e-12	0.0241009	20925	NA	rs111795862	NA	|| id:eqtl-a-ENSG00000067836	TRUE	reported	eqtl-a-ENSG00000067836	eqtl-a-ENSG00000067836	rs111795862	5.90201080171845e-12	0.00225836813628096	47.3587900979364
0.778603	0.0448109	1.27145208991705e-67	0.0175806	28965	NA	rs138563206	NA	|| id:eqtl-a-ENSG00000067836	TRUE	reported	eqtl-a-ENSG00000067836	eqtl-a-ENSG00000067836	rs138563206	1.27145208991705e-67	0.0103154474556925	301.880335396917
-0.212516	0.0301082	1.68189933942853e-12	0.0405867	26757	NA	rs2450391	NA	|| id:eqtl-a-ENSG00000067836	TRUE	reported	eqtl-a-ENSG00000067836	eqtl-a-ENSG00000067836	rs2450391	1.68189933942853e-12	0.00185852481739367	49.8174183977985
-0.270091	0.0476258	1.41801230658528e-08	0.0158324	15623	NA	rs147469348	NA	|| id:eqtl-a-ENSG00000067836	TRUE	reported	eqtl-a-ENSG00000067836	eqtl-a-ENSG00000067836	rs147469348	1.41801230658528e-08	0.00205436736339609	32.1573355642874
-0.334804	0.0499551	2.05305223927947e-11	0.0143558	15872	NA	rs144877686	NA	|| id:eqtl-a-ENSG00000067836	TRUE	reported	eqtl-a-ENSG00000067836	eqtl-a-ENSG00000067836	rs144877686	2.05305223927947e-11	0.00282203651139743	44.912464049241
0.328624	0.0353865	1.59294213512763e-20	0.0289554	26470	NA	rs76197627	NA	|| id:eqtl-a-ENSG00000067836	TRUE	reported	eqtl-a-ENSG00000067836	eqtl-a-ENSG00000067836	rs76197627	1.59294213512763e-20	0.00324755641025621	86.2363805772022
0.742333	0.0376894	2.33345806228098e-86	0.0248899	29141	NA	rs148771812	NA	|| id:eqtl-a-ENSG00000067836	TRUE	reported	eqtl-a-ENSG00000067836	eqtl-a-ENSG00000067836	rs148771812	2.33345806228098e-86	0.0131374568233074	387.908485352062
-0.278875	0.0486803	1.01139313159964e-08	0.0151426	13594	NA	rs117340071	NA	|| id:eqtl-a-ENSG00000067836	TRUE	reported	eqtl-a-ENSG00000067836	eqtl-a-ENSG00000067836	rs117340071	1.01139313159964e-08	0.00240834232273324	32.8132143033418
-0.244964	0.041976	5.34687461561607e-09	0.020475	22169	NA	rs72770333	NA	|| id:eqtl-a-ENSG00000067836	TRUE	reported	eqtl-a-ENSG00000067836	eqtl-a-ENSG00000067836	rs72770333	5.34687461561607e-09	0.00153387390750357	34.0536168619923
0.281757	0.0488127	7.82438118363527e-09	0.0150587	17161	NA	rs62037135	NA	|| id:eqtl-a-ENSG00000067836	TRUE	reported	eqtl-a-ENSG00000067836	eqtl-a-ENSG00000067836	rs62037135	7.82438118363527e-09	0.00193775472164629	33.3144885762666
0.765583	0.037458	7.65067934129101e-93	0.0251534	31155	NA	rs111665197	NA	|| id:eqtl-a-ENSG00000067836	TRUE	reported	eqtl-a-ENSG00000067836	eqtl-a-ENSG00000067836	rs111665197	7.65067934129101e-93	0.0132307133338431	417.702920083547
-0.244871	0.0444437	3.59236122431922e-08	0.0182274	19833	NA	rs183092124	NA	|| id:eqtl-a-ENSG00000067836	TRUE	reported	eqtl-a-ENSG00000067836	eqtl-a-ENSG00000067836	rs183092124	3.59236122431922e-08	0.00152827550947189	30.3536203229004
0.340938	0.0319781	1.53921752695246e-26	0.0356335	29827	NA	rs113849696	NA	|| id:eqtl-a-ENSG00000067836	TRUE	reported	eqtl-a-ENSG00000067836	eqtl-a-ENSG00000067836	rs113849696	1.53921752695246e-26	0.00379650514319644	113.66228534674
0.765176	0.0372755	1.22546242640943e-93	0.0254004	31236	NA	rs76794753	NA	|| id:eqtl-a-ENSG00000067836	TRUE	reported	eqtl-a-ENSG00000067836	eqtl-a-ENSG00000067836	rs76794753	1.22546242640943e-93	0.0133106949623653	421.354771286043
-0.292362	0.0441915	3.69572799739443e-11	0.0184223	18157	NA	rs148388448	NA	|| id:eqtl-a-ENSG00000067836	TRUE	reported	eqtl-a-ENSG00000067836	eqtl-a-ENSG00000067836	rs148388448	3.69572799739443e-11	0.0024047760043445	43.7639508577524
0.448286	0.0220699	1.00716355013214e-91	0.0765148	29567	NA	rs77453132	NA	|| id:eqtl-a-ENSG00000067836	TRUE	reported	eqtl-a-ENSG00000067836	eqtl-a-ENSG00000067836	rs77453132	1.00716355013214e-91	0.0137620793350046	412.55346911125
0.725249	0.0364139	2.9214603738773e-88	0.0266974	29141	NA	rs116938902	NA	|| id:eqtl-a-ENSG00000067836	TRUE	reported	eqtl-a-ENSG00000067836	eqtl-a-ENSG00000067836	rs116938902	2.9214603738773e-88	0.0134296134163842	396.652393647388
0.747874	0.0362842	2.16870259934549e-94	0.0268406	29143	NA	rs117007233	NA	|| id:eqtl-a-ENSG00000067836	TRUE	reported	eqtl-a-ENSG00000067836	eqtl-a-ENSG00000067836	rs117007233	2.16870259934549e-94	0.0143681951768127	424.80728969842
0.801168	0.0345535	6.28058358813321e-119	0.0294477	31240	NA	rs58316211	NA	|| id:eqtl-a-ENSG00000067836	TRUE	reported	eqtl-a-ENSG00000067836	eqtl-a-ENSG00000067836	rs58316211	6.28058358813321e-119	0.0169177242083995	537.570335500599
-0.510048	0.0462948	3.1506488329724e-28	0.016665	24907	NA	rs146221893	NA	|| id:eqtl-a-ENSG00000067836	TRUE	reported	eqtl-a-ENSG00000067836	eqtl-a-ENSG00000067836	rs146221893	3.1506488329724e-28	0.00484981175898039	121.373199025264
0.412992	0.0495723	8.01678063387679e-17	0.0145562	3538	NA	rs145794389	NA	|| id:eqtl-a-ENSG00000067836	TRUE	reported	eqtl-a-ENSG00000067836	eqtl-a-ENSG00000067836	rs145794389	8.01678063387679e-17	0.0192402167401654	69.3680629594095
0.778045	0.0338227	4.30526610491711e-117	0.0307944	29836	NA	rs73504496	NA	|| id:eqtl-a-ENSG00000067836	TRUE	reported	eqtl-a-ENSG00000067836	eqtl-a-ENSG00000067836	rs73504496	4.30526610491711e-117	0.0174267824211613	529.131689579368
-0.269754	0.0481043	2.0490851219745e-08	0.0155148	15710	NA	rs181488178	NA	|| id:eqtl-a-ENSG00000067836	TRUE	reported	eqtl-a-ENSG00000067836	eqtl-a-ENSG00000067836	rs181488178	2.0490851219745e-08	0.00199766821175842	31.4421833204288
-0.277217	0.0314038	1.06954731056616e-18	0.0370982	24766	NA	rs77698840	NA	|| id:eqtl-a-ENSG00000067836	TRUE	reported	eqtl-a-ENSG00000067836	eqtl-a-ENSG00000067836	rs77698840	1.06954731056616e-18	0.00313657089511489	77.9184383525546
0.781707	0.0341842	9.81747943019994e-116	0.0301391	29661	NA	rs117366908	NA	|| id:eqtl-a-ENSG00000067836	TRUE	reported	eqtl-a-ENSG00000067836	eqtl-a-ENSG00000067836	rs117366908	9.81747943019994e-116	0.0173245309941789	522.887037442987
-0.281433	0.0309145	8.73775775118023e-20	0.038317	24766	NA	rs117234488	NA	|| id:eqtl-a-ENSG00000067836	TRUE	reported	eqtl-a-ENSG00000067836	eqtl-a-ENSG00000067836	rs117234488	8.73775775118023e-20	0.00333517670372504	82.8686976408869
0.300334	0.0411969	3.09528041659398e-13	0.0212448	24162	NA	rs142963670	NA	|| id:eqtl-a-ENSG00000067836	TRUE	reported	eqtl-a-ENSG00000067836	eqtl-a-ENSG00000067836	rs142963670	3.09528041659398e-13	0.00219478919546418	53.1427440829451
-0.346151	0.043982	3.53508613361998e-15	0.0185773	16391	NA	rs112152072	NA	|| id:eqtl-a-ENSG00000067836	TRUE	reported	eqtl-a-ENSG00000067836	eqtl-a-ENSG00000067836	rs112152072	3.53508613361998e-15	0.0037647633418162	61.9338727828955
0.78643	0.034223	7.49894209332456e-117	0.0300578	29661	NA	rs117679915	NA	|| id:eqtl-a-ENSG00000067836	TRUE	reported	eqtl-a-ENSG00000067836	eqtl-a-ENSG00000067836	rs117679915	7.49894209332456e-117	0.0174917953163302	528.025267182443
0.689669	0.0121863	1e-200	0.264237	28588	NA	rs58729822	NA	|| id:eqtl-a-ENSG00000067836	TRUE	reported	eqtl-a-ENSG00000067836	eqtl-a-ENSG00000067836	rs58729822	1e-200	0.100747767491525	3202.63389669772
0.473288	0.0112176	1e-200	0.49564	31224	NA	rs6500631	NA	|| id:eqtl-a-ENSG00000067836	TRUE	reported	eqtl-a-ENSG00000067836	eqtl-a-ENSG00000067836	rs6500631	1e-200	0.0539365087983185	1780.01338531951
0.686003	0.0187292	1e-200	0.102783	28250	NA	rs12924244	NA	|| id:eqtl-a-ENSG00000067836	TRUE	reported	eqtl-a-ENSG00000067836	eqtl-a-ENSG00000067836	rs12924244	1e-200	0.0453362460867783	1341.4757543793
0.497486	0.0111688	1e-200	0.468017	30901	NA	rs8053790	NA	|| id:eqtl-a-ENSG00000067836	TRUE	reported	eqtl-a-ENSG00000067836	eqtl-a-ENSG00000067836	rs8053790	1e-200	0.0603323759416056	1983.9037085988
0.757306	0.0242375	1e-200	0.0599984	30584	NA	rs75928264	NA	|| id:eqtl-a-ENSG00000067836	TRUE	reported	eqtl-a-ENSG00000067836	eqtl-a-ENSG00000067836	rs75928264	1e-200	0.0309333195225988	976.199880460317
0.424838	0.0343337	3.63161666207504e-35	0.0306684	15635	NA	rs148093925	NA	|| id:eqtl-a-ENSG00000067836	TRUE	reported	eqtl-a-ENSG00000067836	eqtl-a-ENSG00000067836	rs148093925	3.63161666207504e-35	0.00969784710520554	153.091097855852
-0.290139	0.0382839	3.49301137563555e-14	0.02468	27340	NA	rs78660617	NA	|| id:eqtl-a-ENSG00000067836	TRUE	reported	eqtl-a-ENSG00000067836	eqtl-a-ENSG00000067836	rs78660617	3.49301137563555e-14	0.00209637977600521	57.4312279812815
-0.376039	0.055356	1.09673069864742e-11	0.0116583	9564	NA	rs138861473	NA	|| id:eqtl-a-ENSG00000067836	TRUE	reported	eqtl-a-ENSG00000067836	eqtl-a-ENSG00000067836	rs138861473	1.09673069864742e-11	0.00480182557211213	46.1365960070531
0.750422	0.0242268	1e-200	0.0601268	31569	NA	rs7194170	NA	|| id:eqtl-a-ENSG00000067836	TRUE	reported	eqtl-a-ENSG00000067836	eqtl-a-ENSG00000067836	rs7194170	1e-200	0.0294954982169833	959.381837492683
0.904593	0.028155	1e-200	0.0435367	27780	NA	rs62036113	NA	|| id:eqtl-a-ENSG00000067836	TRUE	reported	eqtl-a-ENSG00000067836	eqtl-a-ENSG00000067836	rs62036113	1e-200	0.0358276094840298	1032.20061685732
0.757838	0.0173674	1e-200	0.117223	30970	NA	rs12444590	NA	|| id:eqtl-a-ENSG00000067836	TRUE	reported	eqtl-a-ENSG00000067836	eqtl-a-ENSG00000067836	rs12444590	1e-200	0.0579201467376464	1903.94805489161
0.77364	0.0172987	1e-200	0.117487	31478	NA	rs9928036	NA	|| id:eqtl-a-ENSG00000067836	TRUE	reported	eqtl-a-ENSG00000067836	eqtl-a-ENSG00000067836	rs9928036	1e-200	0.0597434288758957	1999.96918399573
0.466422	0.0112626	1e-200	0.468461	31566	NA	rs3747613	NA	|| id:eqtl-a-ENSG00000067836	TRUE	reported	eqtl-a-ENSG00000067836	eqtl-a-ENSG00000067836	rs3747613	1e-200	0.0515327727456791	1714.95692439826
0.459596	0.011278	1e-200	0.471401	31684	NA	rs3813749	NA	|| id:eqtl-a-ENSG00000067836	TRUE	reported	eqtl-a-ENSG00000067836	eqtl-a-ENSG00000067836	rs3813749	1e-200	0.0498037023873478	1660.58413719391
0.774368	0.0212428	1e-200	0.0777971	31567	NA	rs77220104	NA	|| id:eqtl-a-ENSG00000067836	TRUE	reported	eqtl-a-ENSG00000067836	eqtl-a-ENSG00000067836	rs77220104	1e-200	0.0403952547972559	1328.75147194691
0.771417	0.0215706	1e-200	0.0755077	31569	NA	rs75403547	NA	|| id:eqtl-a-ENSG00000067836	TRUE	reported	eqtl-a-ENSG00000067836	eqtl-a-ENSG00000067836	rs75403547	1e-200	0.0389354925890549	1278.87013315033
-0.436916	0.0449229	2.33614610221894e-22	0.0177513	18224	NA	rs142264806	NA	|| id:eqtl-a-ENSG00000067836	TRUE	reported	eqtl-a-ENSG00000067836	eqtl-a-ENSG00000067836	rs142264806	2.33614610221894e-22	0.00516378567825174	94.5829084974095
-0.394703	0.0490583	8.58222705054015e-16	0.0148725	12841	NA	rs150101426	NA	|| id:eqtl-a-ENSG00000067836	TRUE	reported	eqtl-a-ENSG00000067836	eqtl-a-ENSG00000067836	rs150101426	8.58222705054015e-16	0.00501571947569008	64.7214469704495
0.771156	0.0214877	1e-200	0.0760956	31568	NA	rs2075635	NA	|| id:eqtl-a-ENSG00000067836	TRUE	reported	eqtl-a-ENSG00000067836	eqtl-a-ENSG00000067836	rs2075635	1e-200	0.0392003884751166	1287.8850571574
0.706384	0.0456843	6.2430958113561e-54	0.0169785	22715	NA	rs146438526	NA	|| id:eqtl-a-ENSG00000067836	TRUE	reported	eqtl-a-ENSG00000067836	eqtl-a-ENSG00000067836	rs146438526	6.2430958113561e-54	0.0104156845852997	239.061432462957
0.205938	0.0296711	3.90481083749253e-12	0.0418515	29650	NA	rs79297306	NA	|| id:eqtl-a-ENSG00000067836	TRUE	reported	eqtl-a-ENSG00000067836	eqtl-a-ENSG00000067836	rs79297306	3.90481083749253e-12	0.00162209374964087	48.1699716993665
-0.688508	0.019103	1e-200	0.901385	31567	NA	rs8057613	NA	|| id:eqtl-a-ENSG00000067836	TRUE	reported	eqtl-a-ENSG00000067836	eqtl-a-ENSG00000067836	rs8057613	1e-200	0.0395246247061307	1298.93468478283
-0.364706	0.014416	3.31131121482599e-141	0.79486	29590	NA	rs4641742	NA	|| id:eqtl-a-ENSG00000067836	TRUE	reported	eqtl-a-ENSG00000067836	eqtl-a-ENSG00000067836	rs4641742	3.31131121482599e-141	0.0211717997185469	639.980754428857
-0.417549	0.0149351	5.35796657513358e-172	0.815476	31684	NA	rs2908662	NA	|| id:eqtl-a-ENSG00000067836	TRUE	reported	eqtl-a-ENSG00000067836	eqtl-a-ENSG00000067836	rs2908662	5.35796657513358e-172	0.0240754744147066	781.575993235014
0.281301	0.0171207	1.15877735615513e-60	0.137483	24161	NA	rs111947418	NA	|| id:eqtl-a-ENSG00000067836	TRUE	reported	eqtl-a-ENSG00000067836	eqtl-a-ENSG00000067836	rs111947418	1.15877735615513e-60	0.0110499161802017	269.937714112309
-0.115307	0.0122763	5.85328943832555e-21	0.371881	31683	NA	rs2340753	NA	|| id:eqtl-a-ENSG00000067836	TRUE	reported	eqtl-a-ENSG00000067836	eqtl-a-ENSG00000067836	rs2340753	5.85328943832555e-21	0.00277678620168611	88.216321519978
0.636691	0.0374403	7.48858907521634e-65	0.0254085	29063	NA	rs148915068	NA	|| id:eqtl-a-ENSG00000067836	TRUE	reported	eqtl-a-ENSG00000067836	eqtl-a-ENSG00000067836	rs148915068	7.48858907521634e-65	0.00985231562059547	289.167109883796
0.151077	0.01327	4.96706679223424e-30	0.725094	30902	NA	rs2908647	NA	|| id:eqtl-a-ENSG00000067836	TRUE	reported	eqtl-a-ENSG00000067836	eqtl-a-ENSG00000067836	rs2908647	4.96706679223424e-30	0.00417686541679834	129.60649024597
-0.150657	0.0134545	4.18890007002782e-29	0.263274	31669	NA	rs28658411	NA	|| id:eqtl-a-ENSG00000067836	TRUE	reported	eqtl-a-ENSG00000067836	eqtl-a-ENSG00000067836	rs28658411	4.18890007002782e-29	0.00394360204974386	125.376481056924
0.605469	0.0423452	2.23923668251234e-46	0.0198678	28228	NA	rs143788280	NA	|| id:eqtl-a-ENSG00000067836	TRUE	reported	eqtl-a-ENSG00000067836	eqtl-a-ENSG00000067836	rs143788280	2.23923668251234e-46	0.00719053570824312	204.430022275882
0.174912	0.0258968	1.43813613956807e-11	0.0557587	15468	NA	rs148809942	NA	|| id:eqtl-a-ENSG00000067836	TRUE	reported	eqtl-a-ENSG00000067836	eqtl-a-ENSG00000067836	rs148809942	1.43813613956807e-11	0.00294058596990122	45.6132322412628
0.385273	0.040834	3.91020926126812e-21	0.0215769	27715	NA	rs116849014	NA	|| id:eqtl-a-ENSG00000067836	TRUE	reported	eqtl-a-ENSG00000067836	eqtl-a-ENSG00000067836	rs116849014	3.91020926126812e-21	0.00320173725837836	89.0147464717632
0.527613	0.0467796	1.673786266002e-29	0.0163087	26076	NA	rs150783384	NA	|| id:eqtl-a-ENSG00000067836	TRUE	reported	eqtl-a-ENSG00000067836	eqtl-a-ENSG00000067836	rs150783384	1.673786266002e-29	0.00485471216799144	127.199280965271
-0.0797219	0.0131857	1.48299606954981e-09	0.283708	31560	NA	rs4786582	NA	|| id:eqtl-a-ENSG00000067836	TRUE	reported	eqtl-a-ENSG00000067836	eqtl-a-ENSG00000067836	rs4786582	1.48299606954981e-09	0.00115693554462674	36.5528612217358
0.226509	0.0252007	2.51767692775885e-19	0.0589338	28805	NA	rs76289087	NA	|| id:eqtl-a-ENSG00000067836	TRUE	reported	eqtl-a-ENSG00000067836	eqtl-a-ENSG00000067836	rs76289087	2.51767692775885e-19	0.00279680057628976	80.7821786426557
-0.124575	0.0224938	3.05253041577366e-08	0.0755692	31296	NA	rs3760029	NA	|| id:eqtl-a-ENSG00000067836	TRUE	reported	eqtl-a-ENSG00000067836	eqtl-a-ENSG00000067836	rs3760029	3.05253041577366e-08	0.000979088340730253	30.6696188009952
-0.111629	0.0196137	1.25849066944287e-08	0.102345	27211	NA	rs35707520	NA	|| id:eqtl-a-ENSG00000067836	TRUE	reported	eqtl-a-ENSG00000067836	eqtl-a-ENSG00000067836	rs35707520	1.25849066944287e-08	0.00118897804634756	32.3894139652095
0.114661	0.0187016	8.721877848378e-10	0.885988	26393	NA	rs9302786	NA	|| id:eqtl-a-ENSG00000067836	TRUE	reported	eqtl-a-ENSG00000067836	eqtl-a-ENSG00000067836	rs9302786	8.721877848378e-10	0.00142222091955311	37.5872897176718
0.172027	0.0308907	2.56501553643212e-08	0.0385249	25114	NA	rs142316450	NA	|| id:eqtl-a-ENSG00000067836	TRUE	reported	eqtl-a-ENSG00000067836	eqtl-a-ENSG00000067836	rs142316450	2.56501553643212e-08	0.0012333486842164	31.0100984221285
0.100683	0.0128907	5.70033002218961e-15	0.305723	31185	NA	rs8073060	NA	|| id:eqtl-a-ENSG00000067836	TRUE	reported	eqtl-a-ENSG00000067836	eqtl-a-ENSG00000067836	rs8073060	5.70033002218961e-15	0.00195238205104467	61.0002252425992
-0.0859397	0.0119673	6.91034929404939e-13	0.440335	31355	NA	rs225245	NA	|| id:eqtl-a-ENSG00000067836	TRUE	reported	eqtl-a-ENSG00000067836	eqtl-a-ENSG00000067836	rs225245	6.91034929404939e-13	0.0016420062458385	51.5664943315428
0.115404	0.0135488	1.62592309527955e-17	0.740866	31569	NA	rs9944715	NA	|| id:eqtl-a-ENSG00000067836	TRUE	reported	eqtl-a-ENSG00000067836	eqtl-a-ENSG00000067836	rs9944715	1.62592309527955e-17	0.00229288516449805	72.5458452800988
0.0795565	0.0128154	5.36636242464782e-10	0.686812	31683	NA	rs2905424	NA	|| id:eqtl-a-ENSG00000067836	TRUE	reported	eqtl-a-ENSG00000067836	eqtl-a-ENSG00000067836	rs2905424	5.36636242464782e-10	0.00121487829170197	38.5353749498993
-0.0754581	0.0125957	2.08809378141979e-09	0.334811	31484	NA	rs7245983	NA	|| id:eqtl-a-ENSG00000067836	TRUE	reported	eqtl-a-ENSG00000067836	eqtl-a-ENSG00000067836	rs7245983	2.08809378141979e-09	0.00113862949337006	35.8871959299964
-0.0683961	0.0122942	2.64868309683392e-08	0.627076	30389	NA	rs3094188	NA	|| id:eqtl-a-ENSG00000106397	TRUE	reported	eqtl-a-ENSG00000106397	eqtl-a-ENSG00000106397	rs3094188	2.64868309683392e-08	0.00101742787508438	30.9480682675245
-0.148771	0.0161228	2.76757883062595e-20	0.161556	27101	NA	rs28749551	NA	|| id:eqtl-a-ENSG00000106397	TRUE	reported	eqtl-a-ENSG00000106397	eqtl-a-ENSG00000106397	rs28749551	2.76757883062595e-20	0.00313190091151843	85.1380266645536
-0.110131	0.012336	4.35311359229638e-19	0.363875	30389	NA	rs11967684	NA	|| id:eqtl-a-ENSG00000106397	TRUE	reported	eqtl-a-ENSG00000106397	eqtl-a-ENSG00000106397	rs11967684	4.35311359229638e-19	0.00261587198970277	79.6969792467736
-0.149692	0.0128016	1.37752661960517e-31	0.310471	27280	NA	rs34794906	NA	|| id:eqtl-a-ENSG00000106397	TRUE	reported	eqtl-a-ENSG00000106397	eqtl-a-ENSG00000106397	rs34794906	1.37752661960517e-31	0.00498715649421693	136.72150639778
-0.108673	0.0120905	2.50841852825238e-19	0.40485	30389	NA	rs9468925	NA	|| id:eqtl-a-ENSG00000106397	TRUE	reported	eqtl-a-ENSG00000106397	eqtl-a-ENSG00000106397	rs9468925	2.50841852825238e-19	0.00265146156559733	80.7841586856703
-0.119262	0.0137831	5.03384686834812e-18	0.754006	30389	NA	rs6457374	NA	|| id:eqtl-a-ENSG00000106397	TRUE	reported	eqtl-a-ENSG00000106397	eqtl-a-ENSG00000106397	rs6457374	5.03384686834812e-18	0.00245767970057663	74.8655085019405
-0.112651	0.0122341	3.32276785211075e-20	0.621411	27608	NA	rs4947311	NA	|| id:eqtl-a-ENSG00000106397	TRUE	reported	eqtl-a-ENSG00000106397	eqtl-a-ENSG00000106397	rs4947311	3.32276785211075e-20	0.00306167716466503	84.7802295004194
-0.0834187	0.0143294	5.82867714401254e-09	0.220902	30773	NA	rs9266406	NA	|| id:eqtl-a-ENSG00000106397	TRUE	reported	eqtl-a-ENSG00000106397	eqtl-a-ENSG00000106397	rs9266406	5.82867714401254e-09	0.00110007669908588	33.8877392198722
-0.0784667	0.0122401	1.44760475172881e-10	0.380631	29880	NA	rs2244020	NA	|| id:eqtl-a-ENSG00000106397	TRUE	reported	eqtl-a-ENSG00000106397	eqtl-a-ENSG00000106397	rs2244020	1.44760475172881e-10	0.00137348318004658	41.0933715080094
-0.0767916	0.0135559	1.47021212465339e-08	0.259852	30389	NA	rs1131896	NA	|| id:eqtl-a-ENSG00000106397	TRUE	reported	eqtl-a-ENSG00000106397	eqtl-a-ENSG00000106397	rs1131896	1.47021212465339e-08	0.00105486272946152	32.0879621554893
-0.0722577	0.0120564	2.05750073960897e-09	0.583185	30773	NA	rs2516448	NA	|| id:eqtl-a-ENSG00000106397	TRUE	reported	eqtl-a-ENSG00000106397	eqtl-a-ENSG00000106397	rs2516448	2.05750073960897e-09	0.0011658871081136	35.9173878231839
0.0870759	0.0125424	3.85478357665772e-12	0.340035	30773	NA	rs2523696	NA	|| id:eqtl-a-ENSG00000106397	TRUE	reported	eqtl-a-ENSG00000106397	eqtl-a-ENSG00000106397	rs2523696	3.85478357665772e-12	0.00156381410294147	48.1954925525639
-0.0705555	0.0120013	4.12752773315101e-09	0.431752	27096	NA	rs13245010	NA	|| id:eqtl-a-ENSG00000106397	TRUE	reported	eqtl-a-ENSG00000106397	eqtl-a-ENSG00000106397	rs13245010	4.12752773315101e-09	0.00127393234812402	34.5599500784268
-0.208714	0.0362559	8.57235208208405e-09	0.0276498	1519	NA	rs11546151	NA	|| id:eqtl-a-ENSG00000106397	TRUE	reported	eqtl-a-ENSG00000106397	eqtl-a-ENSG00000106397	rs11546151	8.57235208208405e-09	0.0213508433650753	33.0958537747983
-0.25046	0.0449555	2.52702768567123e-08	0.0178063	1404	NA	rs117827620	NA	|| id:eqtl-a-ENSG00000106397	TRUE	reported	eqtl-a-ENSG00000106397	eqtl-a-ENSG00000106397	rs117827620	2.52702768567123e-08	0.0216295413809405	30.9950251961622
-0.25205	0.0458672	3.8983425660801e-08	0.017094	1404	NA	rs11975104	NA	|| id:eqtl-a-ENSG00000106397	TRUE	reported	eqtl-a-ENSG00000106397	eqtl-a-ENSG00000106397	rs11975104	3.8983425660801e-08	0.0210552318145788	30.1543416578618
0.0941522	0.0143356	5.11328500301965e-11	0.220433	31470	NA	rs11769624	NA	|| id:eqtl-a-ENSG00000106397	TRUE	reported	eqtl-a-ENSG00000106397	eqtl-a-ENSG00000106397	rs11769624	5.11328500301965e-11	0.00136879240421028	43.1321984012376
0.0937053	0.0143656	6.90080888548453e-11	0.219168	31384	NA	rs1047319	NA	|| id:eqtl-a-ENSG00000106397	TRUE	reported	eqtl-a-ENSG00000106397	eqtl-a-ENSG00000106397	rs1047319	6.90080888548453e-11	0.00135389221214717	42.545447351434
0.0831216	0.0148747	2.29699473638176e-08	0.199577	31352	NA	rs10953330	NA	|| id:eqtl-a-ENSG00000106397	TRUE	reported	eqtl-a-ENSG00000106397	eqtl-a-ENSG00000106397	rs10953330	2.29699473638176e-08	0.000995024463910404	31.2250866687143
0.15109	0.0222197	1.04905920777644e-11	0.0775241	22077	NA	rs17515974	NA	|| id:eqtl-a-ENSG00000188322	TRUE	reported	eqtl-a-ENSG00000188322	eqtl-a-ENSG00000188322	rs17515974	1.04905920777644e-11	0.00209000043855819	46.233387481284
0.158661	0.0224653	1.63643967388343e-12	0.0756664	21760	NA	rs72785834	NA	|| id:eqtl-a-ENSG00000188322	TRUE	reported	eqtl-a-ENSG00000188322	eqtl-a-ENSG00000188322	rs72785834	1.63643967388343e-12	0.00228698163637773	49.8742078417697
0.068448	0.0118899	8.58242466589598e-09	0.495979	26487	NA	rs205396	NA	|| id:eqtl-a-ENSG00000188322	TRUE	reported	eqtl-a-ENSG00000188322	eqtl-a-ENSG00000188322	rs205396	8.58242466589598e-09	0.00124965258999211	33.1384604088193
-0.146984	0.0151556	3.06266855800377e-22	0.188872	25827	NA	rs4788030	NA	|| id:eqtl-a-ENSG00000188322	TRUE	reported	eqtl-a-ENSG00000188322	eqtl-a-ENSG00000188322	rs4788030	3.06266855800377e-22	0.00362861706039688	94.0503081373924
0.0737762	0.0127731	7.64962243388903e-09	0.682739	26494	NA	rs176108	NA	|| id:eqtl-a-ENSG00000188322	TRUE	reported	eqtl-a-ENSG00000188322	eqtl-a-ENSG00000188322	rs176108	7.64962243388903e-09	0.00125760973701005	33.358549189143
0.173573	0.0226949	2.04126787125529e-14	0.0739619	21626	NA	rs205358	NA	|| id:eqtl-a-ENSG00000188322	TRUE	reported	eqtl-a-ENSG00000188322	eqtl-a-ENSG00000188322	rs205358	2.04126787125529e-14	0.00269748171618982	58.4881152523964
-0.0837572	0.012989	1.13039440692112e-10	0.298364	26156	NA	rs188192	NA	|| id:eqtl-a-ENSG00000188322	TRUE	reported	eqtl-a-ENSG00000188322	eqtl-a-ENSG00000188322	rs188192	1.13039440692112e-10	0.00158720008760795	41.5776230983225
0.0765209	0.0127697	2.06509483270692e-09	0.682527	26492	NA	rs11645279	NA	|| id:eqtl-a-ENSG00000188322	TRUE	reported	eqtl-a-ENSG00000188322	eqtl-a-ENSG00000188322	rs11645279	2.06509483270692e-09	0.00135361680313912	35.9059119609177
-0.0851011	0.0129197	4.48848729274599e-11	0.303957	26484	NA	rs2412053	NA	|| id:eqtl-a-ENSG00000188322	TRUE	reported	eqtl-a-ENSG00000188322	eqtl-a-ENSG00000188322	rs2412053	4.48848729274599e-11	0.001635577042486	43.3843096199327
-0.0746904	0.0127774	5.04754268172637e-09	0.316826	26494	NA	rs7194756	NA	|| id:eqtl-a-ENSG00000188322	TRUE	reported	eqtl-a-ENSG00000188322	eqtl-a-ENSG00000188322	rs7194756	5.04754268172637e-09	0.00128806357096403	34.167389892214
-0.0728206	0.0130023	2.1335852484891e-08	0.297681	26609	NA	rs7199187	NA	|| id:eqtl-a-ENSG00000188322	TRUE	reported	eqtl-a-ENSG00000188322	eqtl-a-ENSG00000188322	rs7199187	2.1335852484891e-08	0.0011774106064202	31.3642926558581
-0.260247	0.0374203	3.53020560376661e-12	0.0258808	15185	NA	rs117576807	NA	|| id:eqtl-a-ENSG00000188322	TRUE	reported	eqtl-a-ENSG00000188322	eqtl-a-ENSG00000188322	rs117576807	3.53020560376661e-12	0.00317512629044363	48.3614963262362
-0.260295	0.0368664	1.65805907510892e-12	0.0266835	14672	NA	rs143847289	NA	|| id:eqtl-a-ENSG00000188322	TRUE	reported	eqtl-a-ENSG00000188322	eqtl-a-ENSG00000188322	rs143847289	1.65805907510892e-12	0.00338616241175836	49.8437817206174
-0.0755755	0.0130152	6.36780858317989e-09	0.296572	26486	NA	rs12935715	NA	|| id:eqtl-a-ENSG00000188322	TRUE	reported	eqtl-a-ENSG00000188322	eqtl-a-ENSG00000188322	rs12935715	6.36780858317989e-09	0.00127142710611766	33.7153420782305
0.0876039	0.0133657	5.57956061482178e-11	0.72871	26280	NA	rs9938394	NA	|| id:eqtl-a-ENSG00000188322	TRUE	reported	eqtl-a-ENSG00000188322	eqtl-a-ENSG00000188322	rs9938394	5.57956061482178e-11	0.00163203226773756	42.9566505714542
-0.0782777	0.0128339	1.06470673184661e-09	0.311589	26490	NA	rs8061272	NA	|| id:eqtl-a-ENSG00000188322	TRUE	reported	eqtl-a-ENSG00000188322	eqtl-a-ENSG00000188322	rs8061272	1.06470673184661e-09	0.00140238538459014	37.1985507709528
0.0772569	0.0129121	2.18529463734253e-09	0.695112	25857	NA	rs11861670	NA	|| id:eqtl-a-ENSG00000188322	TRUE	reported	eqtl-a-ENSG00000188322	eqtl-a-ENSG00000188322	rs11861670	2.18529463734253e-09	0.00138261664203001	35.7970468724273
-0.377447	0.0120541	1e-200	0.648473	25742	NA	rs12922840	NA	|| id:eqtl-a-ENSG00000188322	TRUE	reported	eqtl-a-ENSG00000188322	eqtl-a-ENSG00000188322	rs12922840	1e-200	0.0366915012601116	980.412031733033
0.23712	0.0361369	5.32353360608262e-11	0.0278173	11234	NA	rs117859971	NA	|| id:eqtl-a-ENSG00000188322	TRUE	reported	eqtl-a-ENSG00000188322	eqtl-a-ENSG00000188322	rs117859971	5.32353360608262e-11	0.00381802567215671	43.0484243389361
0.390197	0.0118475	1e-200	0.37493	25034	NA	rs12921103	NA	|| id:eqtl-a-ENSG00000188322	TRUE	reported	eqtl-a-ENSG00000188322	eqtl-a-ENSG00000188322	rs12921103	1e-200	0.0415300698754231	1084.62527247618
0.356045	0.0303826	1.02352864132879e-31	0.0395701	18145	NA	rs72791856	NA	|| id:eqtl-a-ENSG00000188322	TRUE	reported	eqtl-a-ENSG00000188322	eqtl-a-ENSG00000188322	rs72791856	1.02352864132879e-31	0.00751153003574208	137.313
0.158943	0.0122335	1.3511389070662e-38	0.373108	26491	NA	rs2055390	NA	|| id:eqtl-a-ENSG00000188322	TRUE	reported	eqtl-a-ENSG00000188322	eqtl-a-ENSG00000188322	rs2055390	1.3511389070662e-38	0.00633175957433402	168.790721632288
-0.189989	0.0119231	3.64502070830306e-57	0.427726	21626	NA	rs12598357	NA	|| id:eqtl-a-ENSG00000188322	TRUE	reported	eqtl-a-ENSG00000188322	eqtl-a-ENSG00000188322	rs12598357	3.64502070830306e-57	0.0116046761261622	253.885778788004
-0.157983	0.0124069	3.84680347771888e-37	0.350038	14407	NA	rs62032566	NA	|| id:eqtl-a-ENSG00000188322	TRUE	reported	eqtl-a-ENSG00000188322	eqtl-a-ENSG00000188322	rs62032566	3.84680347771888e-37	0.0111291036850011	162.118977492258
-0.196167	0.0120013	4.69029328405936e-60	0.407109	25616	NA	rs151179	NA	|| id:eqtl-a-ENSG00000188322	TRUE	reported	eqtl-a-ENSG00000188322	eqtl-a-ENSG00000188322	rs151179	4.69029328405936e-60	0.0103223308099068	267.153831591778
-0.1993	0.0119564	2.20241927888395e-62	0.416382	26609	NA	rs34835	NA	|| id:eqtl-a-ENSG00000188322	TRUE	reported	eqtl-a-ENSG00000188322	eqtl-a-ENSG00000188322	rs34835	2.20241927888395e-62	0.0103341263466464	277.831242872108
-0.208496	0.0118017	7.58402926195542e-70	0.465792	26076	NA	rs40836	NA	|| id:eqtl-a-ENSG00000188322	TRUE	reported	eqtl-a-ENSG00000188322	eqtl-a-ENSG00000188322	rs40836	7.58402926195542e-70	0.0118276385469513	312.085076959382
0.217175	0.0121055	5.7253230939418e-72	0.383116	21008	NA	rs153103	NA	|| id:eqtl-a-ENSG00000188322	TRUE	reported	eqtl-a-ENSG00000188322	eqtl-a-ENSG00000188322	rs153103	5.7253230939418e-72	0.0150892058962656	321.819865265454
-0.207771	0.0119338	6.8801831614303e-68	0.419388	26609	NA	rs4788083	NA	|| id:eqtl-a-ENSG00000188322	TRUE	reported	eqtl-a-ENSG00000188322	eqtl-a-ENSG00000188322	rs4788083	6.8801831614303e-68	0.0112632692048723	303.095651653437
-0.210384	0.011929	1.29449387536628e-69	0.419787	26492	NA	rs9926245	NA	|| id:eqtl-a-ENSG00000188322	TRUE	reported	eqtl-a-ENSG00000188322	eqtl-a-ENSG00000188322	rs9926245	1.29449387536628e-69	0.0116046827371802	311.017302833056
-0.210358	0.0119302	1.38931268173674e-69	0.419498	26608	NA	rs3859172	NA	|| id:eqtl-a-ENSG00000188322	TRUE	reported	eqtl-a-ENSG00000188322	eqtl-a-ENSG00000188322	rs3859172	1.38931268173674e-69	0.0115495559337808	310.877987883817
0.177234	0.0123425	9.30250688232133e-47	0.355718	25159	NA	rs497523	NA	|| id:eqtl-a-ENSG00000188322	TRUE	reported	eqtl-a-ENSG00000188322	eqtl-a-ENSG00000188322	rs497523	9.30250688232133e-47	0.00812923208436612	206.18320265266
-0.193669	0.0121411	2.76821616257459e-57	0.381919	26486	NA	rs12448429	NA	|| id:eqtl-a-ENSG00000188322	TRUE	reported	eqtl-a-ENSG00000188322	eqtl-a-ENSG00000188322	rs12448429	2.76821616257459e-57	0.00951558340496277	254.431777698598
-0.193187	0.0121328	4.40250644073916e-57	0.383351	26494	NA	rs55792032	NA	|| id:eqtl-a-ENSG00000188322	TRUE	reported	eqtl-a-ENSG00000188322	eqtl-a-ENSG00000188322	rs55792032	4.40250644073916e-57	0.00947872655568393	253.513408187588
-0.211363	0.0120539	7.74461797802511e-69	0.393234	22451	NA	rs4149392	NA	|| id:eqtl-a-ENSG00000188322	TRUE	reported	eqtl-a-ENSG00000188322	eqtl-a-ENSG00000188322	rs4149392	7.74461797802511e-69	0.0135101352994454	307.442618712877
0.183322	0.011996	1.0080916093643e-52	0.588593	25843	NA	rs2411453	NA	|| id:eqtl-a-ENSG00000188322	TRUE	reported	eqtl-a-ENSG00000188322	eqtl-a-ENSG00000188322	rs2411453	1.0080916093643e-52	0.00895584024725106	233.519228736439
-0.188186	0.0119819	1.37594159606338e-55	0.413408	22352	NA	rs35626515	NA	|| id:eqtl-a-ENSG00000188322	TRUE	reported	eqtl-a-ENSG00000188322	eqtl-a-ENSG00000188322	rs35626515	1.37594159606338e-55	0.010915415833737	246.651851408304
-0.184761	0.0120768	7.76425874712104e-53	0.394722	20764	NA	rs378421	NA	|| id:eqtl-a-ENSG00000188322	TRUE	reported	eqtl-a-ENSG00000188322	eqtl-a-ENSG00000188322	rs378421	7.76425874712104e-53	0.0111464815866922	234.031882774954
-0.169884	0.0121292	1.42429516497328e-44	0.388116	26608	NA	rs4788095	NA	|| id:eqtl-a-ENSG00000188322	TRUE	reported	eqtl-a-ENSG00000188322	eqtl-a-ENSG00000188322	rs4788095	1.42429516497328e-44	0.0073187720204276	196.158890575398
-0.173511	0.0119886	1.78936937444529e-47	0.415495	26519	NA	rs12928404	NA	|| id:eqtl-a-ENSG00000188322	TRUE	reported	eqtl-a-ENSG00000188322	eqtl-a-ENSG00000188322	rs12928404	1.78936937444529e-47	0.00783687686247461	209.451912609973
-0.170629	0.0120696	2.24026812659386e-45	0.39886	26409	NA	rs7187776	NA	|| id:eqtl-a-ENSG00000188322	TRUE	reported	eqtl-a-ENSG00000188322	eqtl-a-ENSG00000188322	rs7187776	2.24026812659386e-45	0.00751092996622792	199.842127844724
-0.170964	0.0121462	5.36537399519849e-45	0.385039	26609	NA	rs4788101	NA	|| id:eqtl-a-ENSG00000188322	TRUE	reported	eqtl-a-ENSG00000188322	eqtl-a-ENSG00000188322	rs4788101	5.36537399519849e-45	0.0073905766424982	198.105184274607
-0.168982	0.0121346	4.41570447353316e-44	0.387349	26409	NA	rs11863370	NA	|| id:eqtl-a-ENSG00000188322	TRUE	reported	eqtl-a-ENSG00000188322	eqtl-a-ENSG00000188322	rs11863370	4.41570447353316e-44	0.00728954799570537	193.908599968845
-0.171137	0.0121452	4.31419727326875e-45	0.385181	26607	NA	rs62037371	NA	|| id:eqtl-a-ENSG00000188322	TRUE	reported	eqtl-a-ENSG00000188322	eqtl-a-ENSG00000188322	rs62037371	4.31419727326875e-45	0.00740719369102892	198.539005015196
0.160693	0.0124182	2.6693160636243e-38	0.651622	26609	NA	rs9931989	NA	|| id:eqtl-a-ENSG00000188322	TRUE	reported	eqtl-a-ENSG00000188322	eqtl-a-ENSG00000188322	rs9931989	2.6693160636243e-38	0.00625350746558434	167.434123679224
0.169565	0.0126176	3.5817890134811e-41	0.674095	26609	NA	rs11646653	NA	|| id:eqtl-a-ENSG00000188322	TRUE	reported	eqtl-a-ENSG00000188322	eqtl-a-ENSG00000188322	rs11646653	3.5817890134811e-41	0.00674144010938908	180.58691284802
0.156561	0.0125448	9.54992586021429e-36	0.665416	21990	NA	rs4072402	NA	|| id:eqtl-a-ENSG00000188322	TRUE	reported	eqtl-a-ENSG00000188322	eqtl-a-ENSG00000188322	rs4072402	9.54992586021429e-36	0.00703313922942316	155.740006526045
0.140162	0.012805	6.94544377583401e-28	0.689156	23700	NA	rs11639897	NA	|| id:eqtl-a-ENSG00000188322	TRUE	reported	eqtl-a-ENSG00000188322	eqtl-a-ENSG00000188322	rs11639897	6.94544377583401e-28	0.00502994308887287	119.802189515294
0.128092	0.0124153	5.8911489032954e-25	0.351993	26519	NA	rs12449272	NA	|| id:eqtl-a-ENSG00000188322	TRUE	reported	eqtl-a-ENSG00000188322	eqtl-a-ENSG00000188322	rs12449272	5.8911489032954e-25	0.00399790697661405	106.438028636136
0.138032	0.0129864	2.17971644113991e-26	0.704018	26608	NA	rs7500321	NA	|| id:eqtl-a-ENSG00000188322	TRUE	reported	eqtl-a-ENSG00000188322	eqtl-a-ENSG00000188322	rs7500321	2.17971644113991e-26	0.00422794871643334	112.96641977893
0.137843	0.0130078	3.07680519375974e-26	0.705664	26609	NA	rs8045689	NA	|| id:eqtl-a-ENSG00000188322	TRUE	reported	eqtl-a-ENSG00000188322	eqtl-a-ENSG00000188322	rs8045689	3.07680519375974e-26	0.00420246615139712	112.286898781598
0.141529	0.0129485	8.24897523935329e-28	0.701236	26608	NA	rs9929088	NA	|| id:eqtl-a-ENSG00000188322	TRUE	reported	eqtl-a-ENSG00000188322	eqtl-a-ENSG00000188322	rs9929088	8.24897523935329e-28	0.0044698621944681	119.459119347374
0.099077	0.0142544	3.63747485642633e-12	0.776149	26158	NA	rs4788117	NA	|| id:eqtl-a-ENSG00000188322	TRUE	reported	eqtl-a-ENSG00000188322	eqtl-a-ENSG00000188322	rs4788117	3.63747485642633e-12	0.00184349480748936	48.3075048189883
0.079409	0.0124013	1.51949753540689e-10	0.642595	26165	NA	rs8060345	NA	|| id:eqtl-a-ENSG00000188322	TRUE	reported	eqtl-a-ENSG00000188322	eqtl-a-ENSG00000188322	rs8060345	1.51949753540689e-10	0.00156460335379097	40.998864506141
0.0750171	0.0131057	1.04169360975413e-08	0.289667	17187	NA	rs192774745	NA	|| id:eqtl-a-ENSG00000188322	TRUE	reported	eqtl-a-ENSG00000188322	eqtl-a-ENSG00000188322	rs192774745	1.04169360975413e-08	0.00190271129642937	32.7604272641701
0.160536	0.0279354	9.10563001842087e-09	0.0475467	16447	NA	rs111379623	NA	|| id:eqtl-a-ENSG00000188322	TRUE	reported	eqtl-a-ENSG00000188322	eqtl-a-ENSG00000188322	rs111379623	9.10563001842087e-09	0.00200390549451142	33.020395609433
0.0753091	0.0129868	6.67913159195983e-09	0.298835	21542	NA	rs60799184	NA	|| id:eqtl-a-ENSG00000188322	TRUE	reported	eqtl-a-ENSG00000188322	eqtl-a-ENSG00000188322	rs60799184	6.67913159195983e-09	0.00155857311683839	33.624070509073
0.0762135	0.0129931	4.47507172047656e-09	0.298303	21867	NA	rs60779366	NA	|| id:eqtl-a-ENSG00000188322	TRUE	reported	eqtl-a-ENSG00000188322	eqtl-a-ENSG00000188322	rs60779366	4.47507172047656e-09	0.0015709640565722	34.4031752486988
0.0812293	0.0131682	6.88969505481137e-10	0.284909	21542	NA	rs12932307	NA	|| id:eqtl-a-ENSG00000188322	TRUE	reported	eqtl-a-ENSG00000188322	eqtl-a-ENSG00000188322	rs12932307	6.88969505481137e-10	0.0017632752640831	38.0480383532251
0.0738403	0.0129207	1.09829751254503e-08	0.30429	21864	NA	rs35189546	NA	|| id:eqtl-a-ENSG00000188322	TRUE	reported	eqtl-a-ENSG00000188322	eqtl-a-ENSG00000188322	rs35189546	1.09829751254503e-08	0.00149154701143329	32.6569100805879
0.0683452	0.0121583	1.89421817785229e-08	0.604414	25217	NA	rs252307	NA	|| id:eqtl-a-ENSG00000188322	TRUE	reported	eqtl-a-ENSG00000188322	eqtl-a-ENSG00000188322	rs252307	1.89421817785229e-08	0.00125150631677401	31.5962747148488
0.0777577	0.0121506	1.55779390394886e-10	0.603725	20834	NA	rs749253	NA	|| id:eqtl-a-ENSG00000188322	TRUE	reported	eqtl-a-ENSG00000188322	eqtl-a-ENSG00000188322	rs749253	1.55779390394886e-10	0.00196185021607027	40.949600684126
0.0705142	0.0122465	8.51157636605598e-09	0.619842	18441	NA	rs3851756	NA	|| id:eqtl-a-ENSG00000188322	TRUE	reported	eqtl-a-ENSG00000188322	eqtl-a-ENSG00000188322	rs3851756	8.51157636605598e-09	0.001794587527549	33.1498897992494
0.074676	0.0123915	1.67440302525506e-09	0.641048	21326	NA	rs2370287	NA	|| id:eqtl-a-ENSG00000188322	TRUE	reported	eqtl-a-ENSG00000188322	eqtl-a-ENSG00000188322	rs2370287	1.67440302525506e-09	0.00170006673180027	36.3139591427475
-0.182705	0.0125796	8.53886210214836e-48	0.3284	22704	NA	rs55908509	NA	|| id:eqtl-a-ENSG00000188322	TRUE	reported	eqtl-a-ENSG00000188322	eqtl-a-ENSG00000188322	rs55908509	8.53886210214836e-48	0.0092055215947229	210.925429842692
0.0890495	0.0151185	3.85726964880267e-09	0.808871	26490	NA	rs2667158	NA	|| id:eqtl-a-ENSG00000196950	TRUE	reported	eqtl-a-ENSG00000196950	eqtl-a-ENSG00000196950	rs2667158	3.85726964880267e-09	0.00130796219436189	34.6906766978753
0.0833427	0.0140201	2.77127739953469e-09	0.765024	25826	NA	rs891516	NA	|| id:eqtl-a-ENSG00000196950	TRUE	reported	eqtl-a-ENSG00000196950	eqtl-a-ENSG00000196950	rs891516	2.77127739953469e-09	0.00136641282995276	35.3345264710103
0.108063	0.0170029	2.07878703716807e-10	0.142482	24761	NA	rs17774667	NA	|| id:eqtl-a-ENSG00000196950	TRUE	reported	eqtl-a-ENSG00000196950	eqtl-a-ENSG00000196950	rs17774667	2.07878703716807e-10	0.0016286657431026	40.3899168073481
-0.151832	0.0276325	3.9159758064876e-08	0.951338	26489	NA	rs7425388	NA	|| id:eqtl-a-ENSG00000196950	TRUE	reported	eqtl-a-ENSG00000196950	eqtl-a-ENSG00000196950	rs7425388	3.9159758064876e-08	0.00113848152386415	30.189330117146
-0.242621	0.0405707	2.22592229795794e-09	0.0219485	17655	NA	rs75803013	NA	|| id:eqtl-a-ENSG00000196950	TRUE	reported	eqtl-a-ENSG00000196950	eqtl-a-ENSG00000196950	rs75803013	2.22592229795794e-09	0.00202155338579865	35.7587701824379
0.160344	0.0293445	4.65521774870129e-08	0.04289	24761	NA	rs1511257	NA	|| id:eqtl-a-ENSG00000196950	TRUE	reported	eqtl-a-ENSG00000196950	eqtl-a-ENSG00000196950	rs1511257	4.65521774870129e-08	0.00120437144952071	29.8549892153199
0.183265	0.0297123	6.92468464322637e-10	0.0417614	21994	NA	rs12987530	NA	|| id:eqtl-a-ENSG00000196950	TRUE	reported	eqtl-a-ENSG00000196950	eqtl-a-ENSG00000196950	rs12987530	6.92468464322637e-10	0.00172675900189417	38.0405708678399
0.161052	0.0292849	3.81092147397493e-08	0.0430718	24761	NA	rs13020830	NA	|| id:eqtl-a-ENSG00000196950	TRUE	reported	eqtl-a-ENSG00000196950	eqtl-a-ENSG00000196950	rs13020830	3.81092147397493e-08	0.00121996234917671	30.2419418336693
0.105195	0.0172977	1.19288890705687e-09	0.136791	23927	NA	rs7603445	NA	|| id:eqtl-a-ENSG00000196950	TRUE	reported	eqtl-a-ENSG00000196950	eqtl-a-ENSG00000196950	rs7603445	1.19288890705687e-09	0.00154331456249575	36.9808740291337
0.164473	0.0293869	2.18599920665939e-08	0.0427558	24675	NA	rs2689944	NA	|| id:eqtl-a-ENSG00000196950	TRUE	reported	eqtl-a-ENSG00000196950	eqtl-a-ENSG00000196950	rs2689944	2.18599920665939e-08	0.00126786653743085	31.3217829184863
0.187261	0.0295789	2.43887757240096e-10	0.0421498	21993	NA	rs13033175	NA	|| id:eqtl-a-ENSG00000196950	TRUE	reported	eqtl-a-ENSG00000196950	eqtl-a-ENSG00000196950	rs13033175	2.43887757240096e-10	0.00181909517355839	40.0766251571183
0.173587	0.0306403	1.46848664083928e-08	0.0391808	24757	NA	rs11693102	NA	|| id:eqtl-a-ENSG00000196950	TRUE	reported	eqtl-a-ENSG00000196950	eqtl-a-ENSG00000196950	rs11693102	1.46848664083928e-08	0.00129475525612333	32.0932192296166
0.0734578	0.0119574	8.08742004287283e-10	0.446064	25827	NA	rs12617577	NA	|| id:eqtl-a-ENSG00000196950	TRUE	reported	eqtl-a-ENSG00000196950	eqtl-a-ENSG00000196950	rs12617577	8.08742004287283e-10	0.0014591307234981	37.7371143172549
-0.209883	0.0297584	1.75105585747878e-12	0.0415902	21796	NA	rs142677173	NA	|| id:eqtl-a-ENSG00000196950	TRUE	reported	eqtl-a-ENSG00000196950	eqtl-a-ENSG00000196950	rs142677173	1.75105585747878e-12	0.0022770289088752	49.7388247819482
-0.161674	0.0278312	6.27725830576322e-09	0.0479198	22089	NA	rs17779587	NA	|| id:eqtl-a-ENSG00000196950	TRUE	reported	eqtl-a-ENSG00000196950	eqtl-a-ENSG00000196950	rs17779587	6.27725830576322e-09	0.0015253779988058	33.7424939174703
-0.246675	0.0414929	2.76458533541404e-09	0.0209631	18461	NA	rs116281018	NA	|| id:eqtl-a-ENSG00000196950	TRUE	reported	eqtl-a-ENSG00000196950	eqtl-a-ENSG00000196950	rs116281018	2.76458533541404e-09	0.00191080701018037	35.3391128254399
-0.164669	0.0265514	5.57493746250781e-10	0.0529103	20582	NA	rs78326486	NA	|| id:eqtl-a-ENSG00000196950	TRUE	reported	eqtl-a-ENSG00000196950	eqtl-a-ENSG00000196950	rs78326486	5.57493746250781e-10	0.00186530743912413	38.4597663855205
-0.209077	0.0368243	1.3643946254838e-08	0.0267806	25989	NA	rs2091108	NA	|| id:eqtl-a-ENSG00000196950	TRUE	reported	eqtl-a-ENSG00000196950	eqtl-a-ENSG00000196950	rs2091108	1.3643946254838e-08	0.00123884107171538	32.2336953563683
-0.400046	0.0520318	1.4876473740795e-14	0.0132041	16510	NA	rs72925706	NA	|| id:eqtl-a-ENSG00000196950	TRUE	reported	eqtl-a-ENSG00000196950	eqtl-a-ENSG00000196950	rs72925706	1.4876473740795e-14	0.00356765546685088	59.1057253108015
0.21289	0.0268026	1.97651447843403e-15	0.0517709	20639	NA	rs72925716	NA	|| id:eqtl-a-ENSG00000196950	TRUE	reported	eqtl-a-ENSG00000196950	eqtl-a-ENSG00000196950	rs72925716	1.97651447843403e-15	0.00304749143230566	63.0833265857834
0.0860658	0.0119481	5.87354093680083e-13	0.552651	26609	NA	rs7559362	NA	|| id:eqtl-a-ENSG00000196950	TRUE	reported	eqtl-a-ENSG00000196950	eqtl-a-ENSG00000196950	rs7559362	5.87354093680083e-13	0.00194620649928306	51.8836927063764
-0.114866	0.0125827	6.91353236037564e-20	0.333947	26609	NA	rs6434780	NA	|| id:eqtl-a-ENSG00000196950	TRUE	reported	eqtl-a-ENSG00000196950	eqtl-a-ENSG00000196950	rs6434780	6.91353236037564e-20	0.00312211373549375	83.3302466679865
-0.114243	0.0125816	1.08168298933793e-19	0.334107	26493	NA	rs4850621	NA	|| id:eqtl-a-ENSG00000196950	TRUE	reported	eqtl-a-ENSG00000196950	eqtl-a-ENSG00000196950	rs4850621	1.08168298933793e-19	0.00310246459028489	82.4431664659085
0.230011	0.0290554	2.44906324184474e-15	0.0436828	17215	NA	rs72925770	NA	|| id:eqtl-a-ENSG00000196950	TRUE	reported	eqtl-a-ENSG00000196950	eqtl-a-ENSG00000196950	rs72925770	2.44906324184474e-15	0.00362709039161291	62.6603817795202
-0.329782	0.0500299	4.34510224171571e-11	0.0143138	20819	NA	rs72925775	NA	|| id:eqtl-a-ENSG00000196950	TRUE	reported	eqtl-a-ENSG00000196950	eqtl-a-ENSG00000196950	rs72925775	4.34510224171571e-11	0.00208271241787842	43.4463105735176
-0.141658	0.0157745	2.70271343194281e-19	0.170681	26491	NA	rs72927723	NA	|| id:eqtl-a-ENSG00000196950	TRUE	reported	eqtl-a-ENSG00000196950	eqtl-a-ENSG00000196950	rs72927723	2.70271343194281e-19	0.00303495729822367	80.6377158970204
0.11283	0.0123999	9.08238693260387e-20	0.644772	26490	NA	rs12993381	NA	|| id:eqtl-a-ENSG00000196950	TRUE	reported	eqtl-a-ENSG00000196950	eqtl-a-ENSG00000196950	rs12993381	9.08238693260387e-20	0.00311584285685765	82.7904074922465
-0.125807	0.014753	1.49176357980966e-17	0.203216	26494	NA	rs35859013	NA	|| id:eqtl-a-ENSG00000196950	TRUE	reported	eqtl-a-ENSG00000196950	eqtl-a-ENSG00000196950	rs35859013	1.49176357980966e-17	0.00273722818160323	72.7136829291346
-0.119132	0.0135003	1.09849984505838e-18	0.261865	26485	NA	rs7340331	NA	|| id:eqtl-a-ENSG00000196950	TRUE	reported	eqtl-a-ENSG00000196950	eqtl-a-ENSG00000196950	rs7340331	1.09849984505838e-18	0.00293153464127796	77.8640931914667
0.13033	0.0127751	1.94222705723317e-24	0.685845	26479	NA	rs10198094	NA	|| id:eqtl-a-ENSG00000196950	TRUE	reported	eqtl-a-ENSG00000196950	eqtl-a-ENSG00000196950	rs10198094	1.94222705723317e-24	0.00391520857667874	104.070434944195
0.307359	0.01204	9.54992586021413e-144	0.628143	26486	NA	rs2036344	NA	|| id:eqtl-a-ENSG00000196950	TRUE	reported	eqtl-a-ENSG00000196950	eqtl-a-ENSG00000196950	rs2036344	9.54992586021413e-144	0.024014086464988	651.637546319902
0.301634	0.0117246	5.8613816451403e-146	0.562073	26493	NA	rs908379	NA	|| id:eqtl-a-ENSG00000196950	TRUE	reported	eqtl-a-ENSG00000196950	eqtl-a-ENSG00000196950	rs908379	5.8613816451403e-146	0.0243734489362452	661.807568752687
0.42047	0.0114558	1e-200	0.559967	26156	NA	rs6434789	NA	|| id:eqtl-a-ENSG00000196950	TRUE	reported	eqtl-a-ENSG00000196950	eqtl-a-ENSG00000196950	rs6434789	1e-200	0.0489820083837142	1347.05700476858
0.436872	0.0113942	1e-200	0.553756	26490	NA	rs10931703	NA	|| id:eqtl-a-ENSG00000196950	TRUE	reported	eqtl-a-ENSG00000196950	eqtl-a-ENSG00000196950	rs10931703	1e-200	0.0525777923834322	1469.96825011725
0.449167	0.0113603	1e-200	0.553741	26609	NA	rs12996251	NA	|| id:eqtl-a-ENSG00000196950	TRUE	reported	eqtl-a-ENSG00000196950	eqtl-a-ENSG00000196950	rs12996251	1e-200	0.0554899232926352	1563.16001857181
0.492811	0.0113135	1e-200	0.577727	26606	NA	rs7014	NA	|| id:eqtl-a-ENSG00000196950	TRUE	reported	eqtl-a-ENSG00000196950	eqtl-a-ENSG00000196950	rs7014	1e-200	0.0665686314564826	1897.2920034085
0.492688	0.0114316	1e-200	0.602253	26493	NA	rs2375524	NA	|| id:eqtl-a-ENSG00000196950	TRUE	reported	eqtl-a-ENSG00000196950	eqtl-a-ENSG00000196950	rs2375524	1e-200	0.0655192827562691	1857.36451000907
0.493405	0.0114046	1e-200	0.597655	26609	NA	rs10931706	NA	|| id:eqtl-a-ENSG00000196950	TRUE	reported	eqtl-a-ENSG00000196950	eqtl-a-ENSG00000196950	rs10931706	1e-200	0.0657197060525989	1871.60558803346
0.494066	0.0114084	1e-200	0.598758	26494	NA	rs10177772	NA	|| id:eqtl-a-ENSG00000196950	TRUE	reported	eqtl-a-ENSG00000196950	eqtl-a-ENSG00000196950	rs10177772	1e-200	0.0661102121585971	1875.37305076837
0.493445	0.0114064	1e-200	0.598012	26609	NA	rs10165594	NA	|| id:eqtl-a-ENSG00000196950	TRUE	reported	eqtl-a-ENSG00000196950	eqtl-a-ENSG00000196950	rs10165594	1e-200	0.0657102813681366	1871.31830897404
0.493532	0.0114087	1e-200	0.598513	26494	NA	rs6728243	NA	|| id:eqtl-a-ENSG00000196950	TRUE	reported	eqtl-a-ENSG00000196950	eqtl-a-ENSG00000196950	rs6728243	1e-200	0.0659735645732917	1871.22291873589
0.48141	0.0112759	1e-200	0.557083	26479	NA	rs13002865	NA	|| id:eqtl-a-ENSG00000196950	TRUE	reported	eqtl-a-ENSG00000196950	eqtl-a-ENSG00000196950	rs13002865	1e-200	0.0644042384651831	1822.61516346042
0.476774	0.0113736	1e-200	0.58049	26494	NA	rs1963515	NA	|| id:eqtl-a-ENSG00000196950	TRUE	reported	eqtl-a-ENSG00000196950	eqtl-a-ENSG00000196950	rs1963515	1e-200	0.0622002066742345	1757.09984896682
0.483821	0.0113812	1e-200	0.586995	26490	NA	rs13430656	NA	|| id:eqtl-a-ENSG00000196950	TRUE	reported	eqtl-a-ENSG00000196950	eqtl-a-ENSG00000196950	rs13430656	1e-200	0.0638632003793579	1807.00988609136
0.482842	0.0113815	1e-200	0.586418	26609	NA	rs6733196	NA	|| id:eqtl-a-ENSG00000196950	TRUE	reported	eqtl-a-ENSG00000196950	eqtl-a-ENSG00000196950	rs6733196	1e-200	0.0633518089227941	1799.61013758029
0.393567	0.0119399	1e-200	0.638862	26494	NA	rs12477772	NA	|| id:eqtl-a-ENSG00000196950	TRUE	reported	eqtl-a-ENSG00000196950	eqtl-a-ENSG00000196950	rs12477772	1e-200	0.0393943185780615	1086.43359908632
0.477561	0.0112728	1e-200	0.55185	26480	NA	rs56278864	NA	|| id:eqtl-a-ENSG00000196950	TRUE	reported	eqtl-a-ENSG00000196950	eqtl-a-ENSG00000196950	rs56278864	1e-200	0.063474012677858	1794.57370156907
-0.386649	0.0214038	6.05619708727763e-73	0.0823583	26494	NA	rs10497768	NA	|| id:eqtl-a-ENSG00000196950	TRUE	reported	eqtl-a-ENSG00000196950	eqtl-a-ENSG00000196950	rs10497768	6.05619708727763e-73	0.0121671246591979	326.30161894568
0.479694	0.0114057	1e-200	0.58959	26493	NA	rs4850376	NA	|| id:eqtl-a-ENSG00000196950	TRUE	reported	eqtl-a-ENSG00000196950	eqtl-a-ENSG00000196950	rs4850376	1e-200	0.062587051566937	1768.69072038226
-0.400448	0.0176901	1.8749945080674e-113	0.124807	26493	NA	rs6737009	NA	|| id:eqtl-a-ENSG00000196950	TRUE	reported	eqtl-a-ENSG00000196950	eqtl-a-ENSG00000196950	rs6737009	1.8749945080674e-113	0.0189749499749888	512.387935226131
0.421761	0.0122196	1e-200	0.676721	26109	NA	rs1462293	NA	|| id:eqtl-a-ENSG00000196950	TRUE	reported	eqtl-a-ENSG00000196950	eqtl-a-ENSG00000196950	rs1462293	1e-200	0.0436366635560905	1191.20247718286
0.426617	0.011962	1e-200	0.651345	26608	NA	rs13028172	NA	|| id:eqtl-a-ENSG00000196950	TRUE	reported	eqtl-a-ENSG00000196950	eqtl-a-ENSG00000196950	rs13028172	1e-200	0.0456222592778777	1271.85052475007
-0.412269	0.0177852	7.14496326075512e-119	0.123014	26493	NA	rs2220339	NA	|| id:eqtl-a-ENSG00000196950	TRUE	reported	eqtl-a-ENSG00000196950	eqtl-a-ENSG00000196950	rs2220339	7.14496326075512e-119	0.0198789046353986	537.292856144929
-0.372112	0.0143988	2.90402265446441e-147	0.205277	26608	NA	rs186895	NA	|| id:eqtl-a-ENSG00000196950	TRUE	reported	eqtl-a-ENSG00000196950	eqtl-a-ENSG00000196950	rs186895	2.90402265446441e-147	0.0244858999970963	667.82413019023
-0.416008	0.0178749	8.24138115012996e-120	0.121542	26493	NA	rs6738975	NA	|| id:eqtl-a-ENSG00000196950	TRUE	reported	eqtl-a-ENSG00000196950	eqtl-a-ENSG00000196950	rs6738975	8.24138115012996e-120	0.0200352803675451	541.605837009827
0.425396	0.0119615	1e-200	0.650926	26609	NA	rs1489802	NA	|| id:eqtl-a-ENSG00000196950	TRUE	reported	eqtl-a-ENSG00000196950	eqtl-a-ENSG00000196950	rs1489802	1e-200	0.0453753118506802	1264.68646516106
-0.410486	0.0176327	7.06317554262968e-120	0.125462	26494	NA	rs4456724	NA	|| id:eqtl-a-ENSG00000196950	TRUE	reported	eqtl-a-ENSG00000196950	eqtl-a-ENSG00000196950	rs4456724	7.06317554262968e-120	0.0200455248056358	541.908891273318
-0.409486	0.0177157	3.31894457552611e-118	0.12417	26492	NA	rs61472649	NA	|| id:eqtl-a-ENSG00000196950	TRUE	reported	eqtl-a-ENSG00000196950	eqtl-a-ENSG00000196950	rs61472649	3.31894457552611e-118	0.0197685746447513	534.230518216326
-0.310157	0.015442	9.90147738776602e-90	0.175078	26491	NA	rs7561860	NA	|| id:eqtl-a-ENSG00000196950	TRUE	reported	eqtl-a-ENSG00000196950	eqtl-a-ENSG00000196950	rs7561860	9.90147738776602e-90	0.0150000917593232	403.38829200746
0.376721	0.0122238	1e-200	0.666959	26225	NA	rs10931715	NA	|| id:eqtl-a-ENSG00000196950	TRUE	reported	eqtl-a-ENSG00000196950	eqtl-a-ENSG00000196950	rs10931715	1e-200	0.0349511127304138	949.71668401459
-0.228291	0.020691	2.63693849345346e-28	0.0901636	26280	NA	rs74633379	NA	|| id:eqtl-a-ENSG00000196950	TRUE	reported	eqtl-a-ENSG00000196950	eqtl-a-ENSG00000196950	rs74633379	2.63693849345346e-28	0.00461086233449763	121.72549994879
0.38202	0.0120056	1e-200	0.643817	26492	NA	rs13021020	NA	|| id:eqtl-a-ENSG00000196950	TRUE	reported	eqtl-a-ENSG00000196950	eqtl-a-ENSG00000196950	rs13021020	1e-200	0.0368129278729764	1012.44554414715
0.355324	0.0118334	4.33510878387529e-198	0.610543	26492	NA	rs2220520	NA	|| id:eqtl-a-ENSG00000196950	TRUE	reported	eqtl-a-ENSG00000196950	eqtl-a-ENSG00000196950	rs2220520	4.33510878387529e-198	0.0329139765396213	901.565338949695
0.384995	0.0127944	6.3095734448021e-199	0.71598	26609	NA	rs6434817	NA	|| id:eqtl-a-ENSG00000196950	TRUE	reported	eqtl-a-ENSG00000196950	eqtl-a-ENSG00000196950	rs6434817	6.3095734448021e-199	0.0329085920089812	905.394154418022
0.35312	0.0118405	1.95433945577538e-195	0.610948	26490	NA	rs12472050	NA	|| id:eqtl-a-ENSG00000196950	TRUE	reported	eqtl-a-ENSG00000196950	eqtl-a-ENSG00000196950	rs12472050	1.95433945577538e-195	0.032484813637652	889.348049273794
-0.386006	0.012931	8.41395141645217e-196	0.274765	26408	NA	rs2139389	NA	|| id:eqtl-a-ENSG00000196950	TRUE	reported	eqtl-a-ENSG00000196950	eqtl-a-ENSG00000196950	rs2139389	8.41395141645217e-196	0.03264191587994	891.027267849575
-0.350506	0.0118759	1.89234361864492e-191	0.384087	26494	NA	rs2375679	NA	|| id:eqtl-a-ENSG00000196950	TRUE	reported	eqtl-a-ENSG00000196950	eqtl-a-ENSG00000196950	rs2375679	1.89234361864492e-191	0.0318317953021752	871.013855911973
-0.351241	0.0118464	3.43557947899876e-193	0.388722	26609	NA	rs2889152	NA	|| id:eqtl-a-ENSG00000196950	TRUE	reported	eqtl-a-ENSG00000196950	eqtl-a-ENSG00000196950	rs2889152	3.43557947899876e-193	0.031981065089345	879.032597550109
-0.351737	0.0118842	1.63305194789431e-192	0.382341	26156	NA	rs10203399	NA	|| id:eqtl-a-ENSG00000196950	TRUE	reported	eqtl-a-ENSG00000196950	eqtl-a-ENSG00000196950	rs10203399	1.63305194789431e-192	0.0324054669283781	875.917084147133
0.350757	0.0118659	4.85288500162129e-192	0.614364	26490	NA	rs2102899	NA	|| id:eqtl-a-ENSG00000196950	TRUE	reported	eqtl-a-ENSG00000196950	eqtl-a-ENSG00000196950	rs2102899	4.85288500162129e-192	0.0319326485476325	873.73259046564
0.348104	0.0118482	9.77237220955831e-190	0.610463	26493	NA	rs2889145	NA	|| id:eqtl-a-ENSG00000196950	TRUE	reported	eqtl-a-ENSG00000196950	eqtl-a-ENSG00000196950	rs2889145	9.77237220955831e-190	0.0315542197697074	863.138497769637
0.346849	0.011851	2.67916832481902e-188	0.610501	26493	NA	rs11890540	NA	|| id:eqtl-a-ENSG00000196950	TRUE	reported	eqtl-a-ENSG00000196950	eqtl-a-ENSG00000196950	rs11890540	2.67916832481902e-188	0.0313198838560195	856.521187337442
0.345123	0.0118484	1.57036280433355e-186	0.609433	26491	NA	rs4850675	NA	|| id:eqtl-a-ENSG00000196950	TRUE	reported	eqtl-a-ENSG00000196950	eqtl-a-ENSG00000196950	rs4850675	1.57036280433355e-186	0.0310340568332581	848.390118614017
0.277669	0.0130867	6.54184123569249e-100	0.722614	26492	NA	rs1519605	NA	|| id:eqtl-a-ENSG00000196950	TRUE	reported	eqtl-a-ENSG00000196950	eqtl-a-ENSG00000196950	rs1519605	6.54184123569249e-100	0.0167094296766016	450.154619084364
0.328616	0.0118763	1.60324539069009e-168	0.608517	26489	NA	rs2168368	NA	|| id:eqtl-a-ENSG00000196950	TRUE	reported	eqtl-a-ENSG00000196950	eqtl-a-ENSG00000196950	rs2168368	1.60324539069009e-168	0.0280914986276877	765.565403637246
0.307887	0.0119292	6.91830970918942e-147	0.610883	26280	NA	rs3748875	NA	|| id:eqtl-a-ENSG00000196950	TRUE	reported	eqtl-a-ENSG00000196950	eqtl-a-ENSG00000196950	rs3748875	6.91830970918942e-147	0.0247208635263113	666.080947956312
-0.103757	0.0133465	7.59276572646525e-15	0.271996	21583	NA	rs17375180	NA	|| id:eqtl-a-ENSG00000196950	TRUE	reported	eqtl-a-ENSG00000196950	eqtl-a-ENSG00000196950	rs17375180	7.59276572646525e-15	0.00279237544586928	60.4310005393805
